# Supplementary material for: SERS enhancement of silver nanoparticles prepared by a template-directed triazole ligand strategy
Source: Royal Society of Chemistry journal article supplement (doi:10.1039/c5cc02883c), 2015-01-01
Supplement: c5cc02883c1.pdf [file c5cc02883c1.pdf]

## **SERS Enhancement of silver nanoparticles prepared by a template-directed triazole ligand strategy**

*Heba A. Kashmery,<sup>1</sup> David G. Thompson,<sup>2</sup> Ruggero Dondi,<sup>3</sup> Duncan Graham,<sup>1,2</sup> Alasdair W. Clark,<sup>4\*</sup> Glenn A. Burley<sup>1\*</sup>*

<sup>1</sup> *Department of Pure & Applied Chemistry, University of Strathclyde, 295 Cathedral Street, Glasgow, G1 1XL, UK.*

<sup>2</sup> *Centre for Molecular Nanometrology, Department of Pure & Applied Chemistry, University of Strathclyde, 295 Cathedral Street, Glasgow, G1 1XL, UK.*

<sup>3</sup> *University of Bath, Department of Pharmacy and Pharmacology, Claverton Down, Bath, BA2 7AY, UK.*

<sup>4</sup> *Biomedical Engineering Research Division, School of Engineering, Rankine Building, Oakfield Avenue, University of Glasgow, Glasgow, UK.*

\* Corresponding author. E-mail: [duncan.graham@strath.ac.uk](mailto:duncan.graham@strath.ac.uk); [alsdair.clark@gla.ac.uk](mailto:alsdair.clark@gla.ac.uk); [glenn.burley@strath.ac.uk](mailto:glenn.burley@strath.ac.uk)

## Table of Contents

|             |                                                                                               |           |
|-------------|-----------------------------------------------------------------------------------------------|-----------|
| <b>1.0</b>  | <b>Abbreviations</b>                                                                          | <b>2</b>  |
| <b>2.0</b>  | <b>Experimental Section</b>                                                                   | <b>3</b>  |
| 2.1         | <i>General.</i>                                                                               | 3         |
| 2.2         | <i>Synthesis of compound (S1)</i>                                                             | 4         |
| 2.3         | <i>Synthesis of compound (3)</i>                                                              | 5         |
| 2.4         | <i>Synthesis of compound (S2a/S2b)</i>                                                        | 6         |
| 2.4.1       | Characterisation of compound (S2a)                                                            | 6         |
| 2.4.2       | Characterisation of compound (S2b)                                                            | 7         |
| 2.5         | <i>Synthesis of compound (4a)</i>                                                             | 8         |
| 2.6         | <i>Synthesis of compound (4b)</i>                                                             | 9         |
| <b>3.0</b>  | <b>Silver nanoparticle (AgNP) formation</b>                                                   | <b>10</b> |
| 3.1         | <i>Preparation of AgNP@(3) series</i>                                                         | 11        |
| 3.2         | <i>Preparation of AgNP@(4a) series</i>                                                        | 12        |
| 3.3         | <i>Preparation of AgNP@(4b) series</i>                                                        | 13        |
| <b>4.0</b>  | <b>TEM images of AgNPs</b>                                                                    | <b>14</b> |
| <b>5.0</b>  | <b>Reaction kinetics of AgNP formation</b>                                                    | <b>15</b> |
| <b>6.0</b>  | <b><sup>1</sup>H NMR titration studies using ligands (3, 4a and 4b) with AgNO<sub>3</sub></b> | <b>16</b> |
| 6.1         | <i><sup>1</sup>H NMR titration studies of Ag(I)-binding using ligand (3)</i>                  | 16        |
| 6.2         | <i><sup>1</sup>H NMR titration studies of Ag(I)-binding using ligand (4a)</i>                 | 19        |
| 6.3         | <i><sup>1</sup>H NMR titration studies of Ag(I)-binding using ligand (4b)</i>                 | 22        |
| <b>7.0</b>  | <b>Calculation of the Ag(I) binding constant</b>                                              | <b>25</b> |
| <b>8.0</b>  | <b>Stability of AgNP@(3), AgNP@(4a) and AgNP@(4b) in salt buffer</b>                          | <b>27</b> |
| <b>9.0</b>  | <b>Surface Enhanced Raman scattering</b>                                                      | <b>28</b> |
| <b>10.0</b> | <b>HRMS, HPLC, <sup>1</sup>H and <sup>13</sup>C NMR spectra</b>                               | <b>30</b> |
| <b>11.0</b> | <b>References</b>                                                                             | <b>67</b> |

## 1.0 Abbreviations

$^1\text{H}$  NMR: Proton nuclear magnetic resonance

$^{13}\text{C}$  NMR:  $^{13}\text{C}$  nuclear magnetic resonance

HMBC: Heteronuclear Multiple-Bond Correlation

HRMS: High resolution mass spectrometry

HSQC: Heteronuclear Single Quantum Coherence

NOESY: Nuclear Overhauser Effect Spectroscopy

ROESY: Rotating-frame Overhauser Effect Spectroscopy

TEM: Transmission electron microscope

UV-Vis: Ultraviolet-visible

## 2.0 Experimental Section

### 2.1 General.

Silver nitrate (99.9999% and  $\text{NH}_3$  (28%) were purchased from Sigma Aldrich. Compounds **(5)**<sup>[1]</sup> and **(6)**<sup>[2]</sup> were prepared as reported previously. Cyclooctyne-EG4 **(7)** was prepared from literature procedures.<sup>[3]</sup> UV-Vis measurements were acquired using a Thermo-Scientific Nanodrop 1000. Time-course kinetics experiments were acquired using a Varian CaryWin 300Bio UV-Visible spectrometer. Electron microscopy images were taken using an FEI Tecnai T20 TEM. SERS analysis was performed using an Avalon Instruments Plate reader (532 nm) using a 96 well plate. High resolution mass spectrometry was performed on a Waters Acquity XEVO Q ToF machine. Nuclear magnetic resonance (NMR) ( $^1\text{H}$ ,  $^{13}\text{C}$ , HSQC, HMBC, ROESY and NOESY) spectra were recorded using a Bruker

400, 500 and 600 MHz spectrometer. Analytical and semi-preparative RP-HPLC was performed at room temperature on an ULTIMAT 3000 Instrument (DIONEX). UV absorbance was measured using a photodiode array detector at 210 and 260 nm. An ACE C18 column (4.6 X 250 mm, 5  $\mu$ m, 300 Å) was used for analytical RP-HPLC. A solvent gradient of increasing amount of MeCN was used for HPLC of compounds (**3**, **4a** and **4b**). A typical gradient started with 90 % H<sub>2</sub>O (solvent A) and 10% MeCN (solvent B). This was held at 2 min. then increased to 90% solvent B over 20 min. For semi-preparative HPLC, an ACE C18 column (21.2 X 250 mm, 5  $\mu$ m, 300 Å) was used.

## 2.2 Synthesis of compound (S1)

**Error! No topic specified.** To a solution of (**5**) (0.10 g, 0.12 mmol) and (**6**) (0.17 g, 0.73 mmol) in THF:H<sub>2</sub>O:DMSO (3:1:2, 1.4 mL) was added a solution of 0.5 M CuSO<sub>4</sub> in H<sub>2</sub>O (0.28 mL) followed by solid sodium ascorbate (0.05 g, 0.25 mmol). The reaction mixture was stirred overnight at room temperature. The suspension was diluted with H<sub>2</sub>O (2 mL), cooled to 0°C and treated with conc. NH<sub>4</sub>OH (0.17 mL) for 10 min. The reaction mixture was diluted with DCM (100 mL) and the organic layer washed with brine (2 × 20 mL), followed by H<sub>2</sub>O (2 × 20 mL). The organic layer was then dried over MgSO<sub>4</sub>, filtered and concentrated *in vacuo*. Purification by column chromatography (SiO<sub>2</sub>) eluting with 10 % of acetone in DCM afforded (**S1**) (0.09, 70%) as a white solid.

HRMS (ESI-TOF) *m/z*: [M + H]<sup>+</sup> Calcd for C<sub>48</sub>H<sub>70</sub>N<sub>9</sub>O<sub>17</sub> 1044.4890; Found 1044.4935.

MP. 65-66°C.

<sup>1</sup>H NMR (CDCl<sub>3</sub>, 500 MHz):  $\delta$  1.29 (s, 6H, CH<sub>3</sub>), 1.36 (s, 6H, CH<sub>3</sub>), 1.38 (s, 6H, CH<sub>3</sub>), 1.50 (s, 6H, CH<sub>3</sub>), 3.58-3.71 (m, 16H, CH<sub>2</sub>-EG), 4.19-4.21 (m, 4H, CH-sugar), 4.33 (dd, 2H, *J* =



2.5, 4.9 Hz, H<sub>2</sub>), 4.47 (dd, 2H,  $J = 8.5, 14.3$  Hz, H<sub>6'</sub>), 4.62-4.65 (m, 4H, CH-sugar, H<sub>6</sub>), 4.68 (s, 2H, CH<sub>2</sub><sup>19</sup>), 5.14 (s, 4H, CH<sub>2</sub>O<sup>9</sup>), 5.44 (s, 2H, CH<sub>2</sub><sup>16</sup>), 5.51 (d, 2H,  $J = 4.9$  Hz, H<sub>1</sub>), 6.52 (d, 2H,  $J = 2.1$  Hz, *o*-Ar-H<sub>13</sub>/H<sub>15</sub>), 6.62 (t, 1H,  $J = 2.1$  Hz, *p*-Ar-H<sub>11</sub>), 7.57 (s, 1H, NCH=C<sup>17</sup>), 7.80 (s, 2H, NCH=C<sup>7</sup>).

<sup>13</sup>C NMR (CDCl<sub>3</sub>, 125 MHz):  $\delta$  24.6 (CH<sub>3</sub>, 2C), 25.1 (CH<sub>3</sub>, 2C), 26.1 (CH<sub>3</sub>, 2C), 26.2 (CH<sub>3</sub>, 2C), 41.2 (CH<sub>2</sub>, 1C<sup>19</sup>), 50.8 (CH<sub>6</sub>/H<sub>6'</sub>, 2C), 54.2 (CH<sub>2</sub>, 1C<sup>16</sup>), 61.8 (CH<sub>2</sub>-EG), 62.3 (OCH<sub>2</sub>, 2C<sup>9</sup>), 64.9 (CH<sub>2</sub>-EG), 67.4 (CH-sugar, 2C), 69.9 (CH<sub>2</sub>-EG), 70.4 (CH<sub>2</sub>-EG), 70.5 (CH-sugar, 2C), 70.65 (CH<sub>2</sub>-EG), 70.7 (CH<sub>2</sub>-EG), 70.74 (CH<sub>2</sub>-EG), 71.0 (CH-sugar, 2C), 71.4 (CH-sugar, 2C), 72.8 (CH<sub>2</sub>-EG), 96.4 (CH<sub>1</sub>, 2C), 102.1 (*p*-Ar-CH<sub>11</sub>, 1C), 107.7 (*o*-Ar-CH<sub>13</sub>/CH<sub>15</sub>, 2C), 109.3 (Cq, 2C), 110.1 (Cq, 2C), 123.0 (NCH=C, 1C<sup>17</sup>), 124.4 (NCH=C, 2C<sup>7</sup>), 137.1 (*p*-Ar-C<sub>14</sub>, 1C), 143.4 (C<sub>8</sub>, 2C), 145.7 (C<sub>18</sub>, 1C), 160.1 (*m*-Ar-C<sub>10</sub>/C<sub>12</sub>, 2C).

### 2.3 Synthesis of compound (3)

**Error! No topic specified.** To a mixture of TFA:H<sub>2</sub>O (1:1, 8 mL) was added (**S1**) (0.08 g, 0.08 mmol) under a nitrogen atmosphere. The reaction mixture was heated to reflux for 4 h. The mixture was then cooled to room temperature followed by concentrated *in vacuo*. The crude residue was diluted with H<sub>2</sub>O (20 mL) and concentrated *in vacuo* again to remove excess TFA. The product was diluted with MeOH and precipitated using Et<sub>2</sub>O. The crude residue was diluted in H<sub>2</sub>O and purified by semi-preparative HPLC using H<sub>2</sub>O and MeCN. The gradient was started at 5% MeCN (solvent B), held at 5 min. then increased to 90% solvent B over 20 min. The product was freeze-dried to afford (**3**) (0.028g, 40%) as a white powder. This compound was isolated as a mixture of diastereomers.

HRMS (ESI-TOF)  $m/z$ : [M + H]<sup>+</sup> Calcd for C<sub>36</sub>H<sub>54</sub>N<sub>9</sub>O<sub>17</sub> 884.3638; Found 884.3612.

MP. 93-95°C.

$^1\text{H}$  NMR ( $\text{D}_2\text{O}$ , 600 MHz):  $\delta$  3.55-3.68 (m), 3.70-3.72 (m), 3.86-3.91 (m), 3.95 (d,  $J$  = 3.3 Hz), 4.02 (d,  $J$  = 2.5 Hz), 4.06-4.08 (m), 4.46 (dd,  $J$  = 4.1, 8.9 Hz), 4.52 (d,  $J$  = 7.9 Hz), 4.60-4.73 (m), 5.15 (s), 5.24 (d,  $J$  = 3.5 Hz), 5.54 (s), 6.61 (d,  $J$  = 1.9 Hz), 6.64 (t,  $J$  = 1.9 Hz), 8.07 (s), 8.09 (s).

$^{13}\text{C}$  NMR ( $\text{D}_2\text{O}$ , 150 MHz):  $\delta$  50.8, 51.0, 53.5, 60.3, 61.3, 63.1, 68.2, 68.8, 68.9, 68.91, 69.0, 69.4, 69.43, 69.46, 69.5, 69.52, 69.6, 71.66, 71.7, 72.6, 73.2, 92.4, 96.5, 102.5, 108.0, 125.2, 125.7, 125.9, 137.7, 142.9, 144.3, 159.1.

## 2.4 Synthesis of compound (S2a/S2b)

**Error! No topic specified.** To a solution of (**5**) (0.30 g, 0.37 mmol) in DMSO (2 mL) was added (**7**) (0.20 g, 0.67 mmol) under a nitrogen atmosphere. The reaction mixture was stirred overnight at room temperature. The reaction mixture was diluted with EtOAc (50 mL) and the organic layer washed with  $\text{H}_2\text{O}$  ( $3 \times 25$  mL). The organic layer was then dried over  $\text{MgSO}_4$ , filtered and concentrated *in vacuo* followed by purification by column chromatography ( $\text{SiO}_2$ ) eluting with 5% MeOH in EtOAc afforded (**S2a**) (0.15 g, 37%) and (**S2b**) (0.107, 26%) as white crystals. Identification of both regioisomers was achieved using 2D NMR NOESY, HSQC, HMBC and ROESY.

### 2.4.1 Characterisation of compound (S2a)

HRMS (ESI-TOF)  $m/z$ :  $[\text{M} + \text{H}]^+$  Calcd for  $\text{C}_{53}\text{H}_{78}\text{N}_9\text{O}_{17}$  1112.5516; Found 1112.5554.

MP. 75-77°C.

$^1\text{H}$  NMR ( $\text{CDCl}_3$ , 400 MHz):  $\delta$  1.14-1.23 (m, 1H, OCT), 1.29 (s, 6H,  $\text{CH}_3$ ), 1.37 (s, 6H,  $\text{CH}_3$ ), 1.39 (s, 6H,  $\text{CH}_3$ ), 1.34-1.48 (m, 2H,  $\text{CH}_2$ , OCT), 1.50 (s, 6H,  $\text{CH}_3$ ), 1.55-1.62 (m,

$^1\text{H}$ , OCT), 1.64-1.75 (m, 2H,  $\text{CH}_2$ , OCT), 1.79-1.88 (m, 1H, OCT), 1.90-1.98 (m, 1H, OCT), 2.78-2.86 (m, 1H, OCT), 3.07-3.13 (m, 1H, OCT), 3.46-3.70 (m, 16H,  $\text{CH}_2\text{-EG}$ ), 4.19-4.21 (m, 4H, CH-sugar), 4.33 (dd, 2H,  $J = 2.5, 4.9$  Hz,  $\text{H}_2$ ), 4.44-4.51 (m, 3H,  $\text{H}_{19} + \text{H}_6$ ), 4.61-4.66 (m, 4H, CH-sugar +  $\text{H}_6$ ), 5.10 (s, 4H,  $\text{CH}_2\text{O}^9$ ), 5.52 (d, 2H,  $J = 4.9$  Hz,  $\text{H}_1$ ), 5.70 (s, 2H,  $\text{CH}_2^{16}$ ), 6.48 (s, 2H,  $o\text{-Ar-H}_{13}/\text{H}_{15}$ ), 6.54 (s, 1H,  $p\text{-Ar-H}_{11}$ ), 7.79 (s, 2H,  $\text{NCH}=\text{C}^7$ ).

$^{13}\text{C}$  NMR ( $\text{CDCl}_3$ , 100 MHz):  $\delta$  23.1 ( $\text{CH}_2\text{-OCT}$ , 1C), 24.5 ( $\text{CH}_2\text{-OCT}$ , 1C), 24.6 ( $\text{CH}_3$ , 2C), 24.9 ( $\text{CH}_2\text{-OCT}$ , 1C), 25.1 ( $\text{CH}_3$ , 2C), 26.1 ( $\text{CH}_3$ , 2C), 26.2 ( $\text{CH}_3$ , 2C), 28.2 ( $\text{CH}_2\text{-OCT}$ , 1C), 30.3 ( $\text{CH}_2\text{-OCT}$ , 1C), 50.8 ( $\text{CH}_6/\text{H}_6$ , 2C), 52.4 ( $\text{CH}_2$ , 1C  $^{16}$ ), 61.8 ( $\text{CH}_2\text{-EG}$ ), 62.2 ( $\text{OCH}_2$ , 2C  $^9$ ), 67.4 (CH-sugar, 2C), 68.2 ( $\text{CH}_2\text{-EG}$ ), 70.5 (CH-sugar, 2C), 70.7 ( $\text{CH}_2\text{-EG}$ ), 70.8 ( $\text{CH}_2\text{-EG}$ ), 70.84 ( $\text{CH}_2\text{-EG}$ ), 71.0 (CH-sugar, 2C), 71.3 (CH-sugar, 2C), 72.2 ( $\text{CH}_{19}$ , 1C), 72.8 ( $\text{CH}_2\text{-EG}$ ), 96.4 ( $\text{CH}_1$ , 2C), 101.7 ( $p\text{-Ar-CH}_{11}$ , 1C), 106.8 ( $o\text{-Ar-CH}_{13}/\text{CH}_{15}$ , 2C), 109.3 (Cq, 2C), 110.1 (Cq, 2C), 124.38 ( $\text{NCH}=\text{C}$ , 1C), 124.4 ( $\text{NCH}=\text{C}$ , 1C), 133.3 ( $\text{C}_{17}$ , 1C), 138.8 ( $p\text{-Ar-C}_{14}$ , 1C), 143.5 ( $\text{C}_8$ , 2C), 145.2 ( $\text{C}_{18}$ , 1C), 159.9 ( $m\text{-Ar-C}_{10}/\text{C}_{12}$ , 2C).

#### 2.4.2 Characterisation of compound (S2b)

HRMS (ESI-TOF)  $m/z$ :  $[\text{M} + \text{H}]^+$  Calcd for  $\text{C}_{53}\text{H}_{78}\text{N}_9\text{O}_{17}$  1112.5516; Found 1112.5559.

MP. 65-67°C.

$^1\text{H}$  NMR ( $\text{CDCl}_3$ , 400 MHz):  $\delta$  0.92-0.99 (m, 1H, OCT), 1.29 (s, 6H,  $\text{CH}_3$ ), 1.37 (s, 6H,  $\text{CH}_3$ ), 1.39 (s, 6H,  $\text{CH}_3$ ), 1.50 (s, 6H,  $\text{CH}_3$ ), 1.34-1.66 (m, 5H, OCT), 1.79-1.86 (m, 1H, OCT), 2.13-2.20 (m, 1H, OCT), 2.52-2.58 (m, 1H, OCT), 2.99-3.06 (m, 1H, OCT), 3.49-3.73 (m, 16H,  $\text{CH}_2\text{-EG}$ ), 4.18-4.21 (m, 4H, CH-sugar), 4.33 (dd, 2H,  $J = 2.6, 4.9$  Hz,  $\text{H}_2$ ), 4.46 (dd, 2H,  $J = 8.4, 14.3$  Hz,  $\text{H}_6$ ), 4.61-4.66 (m, 4H, CH-sugar +  $\text{H}_6$ ), 4.87 (dd, 1H,  $J =$

3.8, 5.7 Hz, H<sub>19</sub>), 5.10 (s, 4H, CH<sub>2</sub>O<sup>9</sup>), 5.33 (dd, 1H, *J* = 2.6, 15.7 Hz, H<sub>16</sub>'), 5.45 (dd, 1H, *J* = 2.5, 15.7 Hz, H<sub>16</sub>'), 5.52 (d, 2H, *J* = 4.9 Hz, H<sub>1</sub>), 6.40 (d, 2H, *J* = 2.2 Hz, *o*-Ar-H<sub>13</sub>/H<sub>15</sub>), 6.57 (t, 1H, *J* = 2.2 Hz, *p*-Ar-H<sub>11</sub>), 7.79 (s, 2H, NCH=C<sup>7</sup>).

<sup>13</sup>C NMR (CDCl<sub>3</sub>, 100 MHz): δ 20.4 (CH<sub>2</sub>-OCT, 1C), 21.1 (CH<sub>2</sub>-OCT, 1C), 24.6 (CH<sub>3</sub>, 2C), 25.1 (CH<sub>3</sub>, 2C), 25.7 (CH<sub>2</sub>-OCT, 1C), 26.1 (CH<sub>3</sub>, 2C), 26.2 (CH<sub>3</sub>, 2C), 26.6 (CH<sub>2</sub>-OCT, 1C), 35.5 (CH<sub>2</sub>-OCT, 1C), 50.8 (CH<sub>6</sub>/H<sub>6</sub>', 2C), 51.8 (CH<sub>16</sub>/H<sub>16</sub>', 2C), 61.9 (CH<sub>2</sub>-EG), 62.2 (OCH<sub>2</sub>, 2C<sup>9</sup>), 67.4 (CH-sugar, 2C), 68.1 (CH<sub>2</sub>-EG), 70.5 (CH<sub>2</sub>-EG), 70.52 (CH-sugar, 2C), 70.6 (CH<sub>2</sub>-EG), 70.7 (CH<sub>2</sub>-EG), 70.8 (CH<sub>2</sub>-EG), 71.0 (CH, 1H-sugar, 2C), 71.4 (CH-sugar, 2C), 72.8 (CH<sub>2</sub>-EG), 74.8 (CH<sub>19</sub>, 1C), 96.4 (CH<sub>1</sub>, 2C), 101.8 (*p*-Ar-CH<sub>11</sub>, 1C), 106.6 (*o*-Ar-CH<sub>13</sub>/CH<sub>15</sub>, 2C), 109.3 (C<sub>q</sub>, 2C), 110.1 (C<sub>q</sub>, 2C), 124.4 (NCH=C, 2C<sup>7</sup>), 134.5 (C<sub>18</sub>, 1C), 138.0 (*p*-Ar-C<sub>14</sub>, 1C), 143.4 (C<sub>8</sub>, 2C), 145.8 (C<sub>17</sub>, 1C), 160.1 (*m*-Ar-C<sub>10</sub>/C<sub>12</sub>, 2C).

## 2.5 Synthesis of compound (4a)

**Error! No topic specified.** To a mixture of TFA:H<sub>2</sub>O (1:1, 8 mL) was added (**S2a**) (0.13 g, 0.12 mmol) under a nitrogen atmosphere. The reaction mixture was heated to reflux for 3 h. The mixture was then cooled to room temperature followed by concentrated *in vacuo*. The crude residue was diluted with H<sub>2</sub>O (20 mL) and concentrated *in vacuo* again to remove excess TFA. The product was diluted with MeOH and precipitated using Et<sub>2</sub>O. The crude residue was diluted in H<sub>2</sub>O and purified by semi-preparative HPLC using H<sub>2</sub>O and MeCN. The gradient was started at 5% MeCN (solvent B), held at 5 min. then increased to 90% solvent B over 20 min. The product was freeze-dried to afford (**4a**) (0.088 g, 77%) as a white powder. This compound was isolated as a mixture of diastereomers.

HRMS (ESI-TOF) *m/z*: [M + H]<sup>+</sup> Calcd for C<sub>41</sub>H<sub>62</sub>N<sub>9</sub>O<sub>17</sub> 952.4264; Found 952.4309.

MP. 93-95°C.

$^1\text{H}$  NMR ( $\text{D}_2\text{O}$ , 600 MHz):  $\delta$  1.01-1.86 (m), 2.80-2.83 (m), 3.00-3.05 (m), 3.39-3.65 (m), 3.66-3.68 (m), 3.83-3.88 (m), 3.92-3.93 (m), 3.99-4.00 (m), 4.05-4.07 (m), 4.42-4.44 (m), 4.50 (dd,  $J$  = 0.5, 7.9 Hz), 4.58-4.71 (m), 5.16 (s), 5.21 (d,  $J$  = 3.6 Hz), 5.60 (s), 6.43 (d,  $J$  = 1.7 Hz), 6.66 (s), 8.05 (s), 8.07 (s).

$^{13}\text{C}$  NMR ( $\text{D}_2\text{O}$ , 150 MHz):  $\delta$  22.0, 23.4, 23.9, 27.9, 30.6, 50.9, 51.0, 52.1, 60.4, 61.4, 67.4, 67.44, 68.2, 68.8, 68.9, 69.1, 69.5, 69.6, 69.65, 69.7, 71.7, 71.73, 72.6, 73.2, 92.4, 96.5, 102.6, 107.3, 125.7, 125.8, 134.3, 138.5, 143.1, 146.3, 159.1.

## 2.6 Synthesis of compound (4b)

To a mixture of TFA: $\text{H}_2\text{O}$  (1:1, 8 mL) was added (**S2b**) (0.09 g, 0.08 mmol) under a nitrogen atmosphere. The reaction mixture was heated to reflux for 3 h. The mixture was then cooled to room temperature followed by concentrated *in vacuo*. The crude residue was diluted with  $\text{H}_2\text{O}$  (20 mL) and concentrated *in vacuo* again to remove excess TFA. The product was diluted with MeOH and precipitated using  $\text{Et}_2\text{O}$ . The crude residue was diluted in  $\text{H}_2\text{O}$  and purified by semi-preparative HPLC using  $\text{H}_2\text{O}$  and MeCN. The gradient was started at 5% MeCN (solvent B), held at 5 min. then increased to 90% solvent B over 20 min. The product was freeze-dried to afford (**4b**) (0.059 g, 77%) as a white powder. This compound was isolated as a mixture of diastereomers.

HRMS (ESI-TOF)  $m/z$ :  $[\text{M} + \text{H}]^+$  Calcd for  $\text{C}_{41}\text{H}_{62}\text{N}_9\text{O}_{17}$  952.4264; Found 952.4293.

MP. 96-98°C.

$^1\text{H}$  NMR ( $\text{D}_2\text{O}$ , 600 MHz):  $\delta$  0.81-1.48 (m), 1.87-2.00 (m), 2.62-2.67 (m), 2.88-2.93 (m), 3.52-3.68 (m), 3.70-3.72 (m), 3.82-3.88 (m), 3.92 (d,  $J$  = 3.5 Hz), 3.99 (d,  $J$  = 2.6 Hz),

4.04-4.06 (m), 4.42 (dd,  $J = 4.1, 9.0$  Hz), 4.49 (d,  $J = 7.9$  Hz), 4.57-4.70 (m), 5.14 (s), 5.21 (d,  $J = 3.5$  Hz), 5.47 (d,  $J = 4.3$  Hz), 6.45 (s), 6.63 (s), 8.06 (s), 8.07 (s).

$^{13}\text{C}$  NMR ( $\text{D}_2\text{O}$ , 150 MHz):  $\delta$  20.0, 21.0, 24.7, 25.9, 34.3, 50.9, 51.0, 51.2, 60.4, 61.4, 67.5, 68.2, 68.8, 68.9, 69.1, 69.5, 69.6, 69.7, 69.8, 71.7, 71.8, 72.6, 73.2, 74.4, 92.4, 96.5, 102.7, 107.4, 125.7, 125.9, 136.0, 138.2, 143.0, 145.3, 159.1

### 3.0 Silver nanoparticle (AgNP) formation

**Preparation of sugar stock solutions:** The corresponding sugar triazole (**3**, **4a** and **4b**) was dissolved in ultrapure water and diluted to a standard concentration of 50 mM. This stock solution was then used to optimise conditions for AgNP formation (Tables S1-S3).

**Preparation of Tollens' reagent stock solutions:** Stock solutions of Tollens' reagent were prepared in three different concentrations (100, 20 and 3 mM) and diluted as required with ultrapure water for the preparation of the nanoparticle arrays.

**100 mM Tollens:** To 1.8 ml  $\text{H}_2\text{O}$  was added  $\text{AgNO}_3$  (0.5 M, 500  $\mu\text{L}$ ), followed by NaOH (3 M, 100  $\mu\text{L}$ ) and finally  $\text{NH}_4\text{OH}$  (28 %, 110  $\mu\text{L}$ )

**20 mM Tollens:** To 4.100  $\mu\text{L}$   $\text{H}_2\text{O}$  was added  $\text{AgNO}_3$  (0.5 M, 279  $\mu\text{L}$ ), followed by NaOH (3 M, 56  $\mu\text{L}$ ) and finally  $\text{NH}_4\text{OH}$  (28%, 61  $\mu\text{L}$ )

**3 mM Tollens:** To 9.9 ml  $\text{H}_2\text{O}$  was added  $\text{AgNO}_3$  (0.5 M, 60  $\mu\text{L}$ ), followed by NaOH (3 M, 12  $\mu\text{L}$ ) and finally  $\text{NH}_4\text{OH}$  (28 %, 13  $\mu\text{L}$ )

AgNPs were formed by the addition of 25  $\mu\text{L}$  of Tollens' reagent to 25  $\mu\text{L}$  of a solution of an appropriate sugar ligand in a plastic tube. The solution was vortexed and left in the dark overnight. The mixture was centrifuged for 30 seconds to afford a suspension of colloidal of AgNPs.

### 3.1 Preparation of AgNP@(**3**) series

**Table S1.** AgNP@(**3**) screening array prepared using (**3**) and the Tollens' reagent. White boxes represent no AgNP formation, yellow boxes represent AgNP formation and grey boxes represent the formation of silver mirrors.

[Tolle

[(3)]

|        |                  |                  |      |        |       |      |
|--------|------------------|------------------|------|--------|-------|------|
|        | 25 mM            | 10 mM            | 1 mM | 100 μM | 10 μM | 1 μM |
| 10 μM  | #1               | #2               | #3   | #4     | #5    | #6   |
| 100 μM | #7               | #8               | #9   | #10    | #11   | #12  |
| 1 mM   | #13              | #14              | #15  | #16    | #17   | #18  |
| 10 mM  | #19<br>15 ± 4 nm | #20<br>15 ± 4 nm | #21  | #22    | #23   | #24  |
| 20 mM  | #25              | #26<br>16 ± 2 nm | #27  | #28    | #29   | #30  |
| 50 mM  | #31              | #32              | #33  | #34    | #35   | #36  |

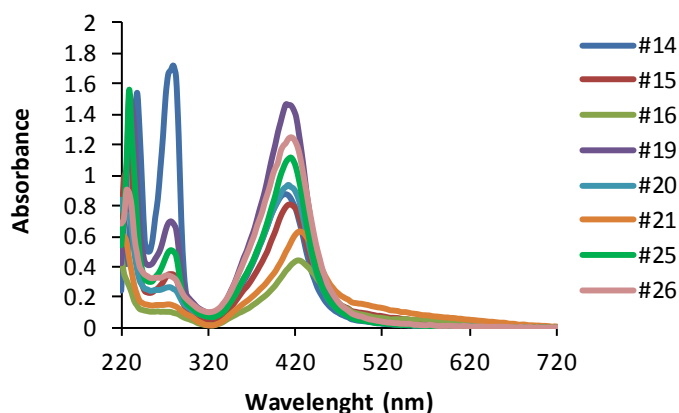

**Figure S1.** UV-vis spectra of reactions #14-16, 19-21 and 25-26 which formed AgNP@(**3**) as observed by a SPR peak. Samples #19, 21, 25 were diluted 1:10 and #20, 26 were diluted 1:20 prior to each measurement.

### 3.2 Preparation of AgNP@(4a) series

**Table S2.** AgNP@(4a) screening array prepared using (4a) and the Tollens' reagent. White boxes represent no AgNP formation, yellow boxes represent AgNP formation and grey box represents the formation of silver mirror.

|         |             |                       |                      |      |             |            |           |
|---------|-------------|-----------------------|----------------------|------|-------------|------------|-----------|
| [(4a)]  |             | 25 mM                 | 10 mM                | 1 mM | 100 $\mu$ M | 10 $\mu$ M | 1 $\mu$ M |
| [Tolle] | 10 $\mu$ M  | #1                    | #2                   | #3   | #4          | #5         | #6        |
|         | 100 $\mu$ M | #7                    | #8                   | #9   | #10         | #11        | #12       |
|         | 1 mM        | #13                   | #14                  | #15  | #16         | #17        | #18       |
|         | 10 mM       | #19<br>19 $\pm$ 10 nm | #20<br>18 $\pm$ 7 nm | #21  | #22         | #23        | #24       |
|         | 20 mM       | #25                   | #26<br>15 $\pm$ 6 nm | #27  | #28         | #29        | #30       |
|         | 50 mM       | #31                   | #32                  | #33  | #34         | #35        | #36       |

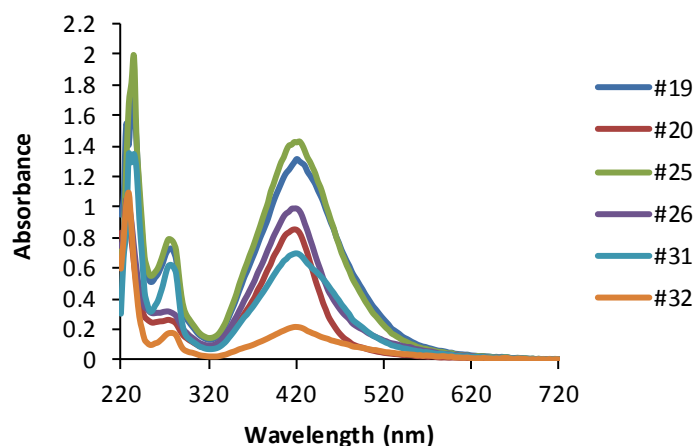

**Figure S2.** UV-vis spectra of reactions #19-20, 25-26 and 31-32 which formed AgNP@(4a) as observed by a SPR peak at 420 nm. Samples #19, 25, 31-32 were diluted 1:10 and #20, 26 were diluted 1:20 prior to each measurement.



### 3.3 Preparation of AgNP@(**4b**) series

**Table S3.** AgNP@(**4b**) screening array prepared using (**4b**) and the Tollens' reagent. White boxes represent no AgNP formation, yellow boxes represent AgNP formation and grey boxes represent the formation of silver mirrors.

|                 |             |                      |                      |      |             |            |           |
|-----------------|-------------|----------------------|----------------------|------|-------------|------------|-----------|
| [( <b>4b</b> )] |             | 25 mM                | 10 mM                | 1 mM | 100 $\mu$ M | 10 $\mu$ M | 1 $\mu$ M |
| [Tolle]         | 10 $\mu$ M  | #1                   | #2                   | #3   | #4          | #5         | #6        |
|                 | 100 $\mu$ M | #7                   | #8                   | #9   | #10         | #11        | #12       |
|                 | 1 mM        | #13                  | #14                  | #15  | #16         | #17        | #18       |
|                 | 10 mM       | #19<br>38 $\pm$ 7 nm | #20<br>17 $\pm$ 5 nm | #21  | #22         | #23        | #24       |
|                 | 20 mM       | #25                  | #26<br>25 $\pm$ 5 nm | #27  | #28         | #29        | #30       |
|                 | 50 mM       | #31                  | #32                  | #33  | #34         | #35        | #36       |

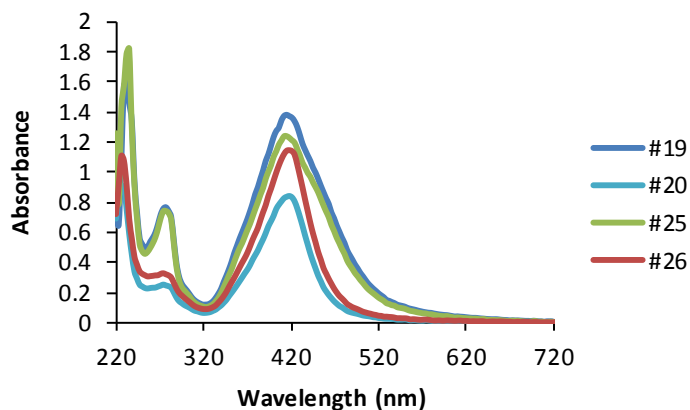

**Figure S3.** UV-vis spectra of reactions #19-20 and 25-26 which formed AgNP@(**4b**) as observed by a SPR peak. Samples #19, 25 were diluted 1:10 and #20, 26 were diluted 1:20 prior to each measurement.

#### 4.0 TEM images of AgNPs

(a)

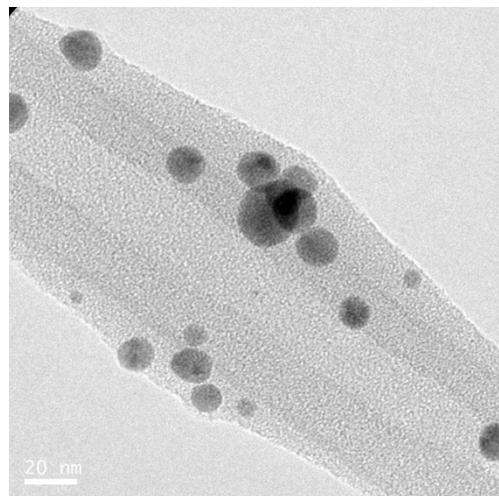

(b)

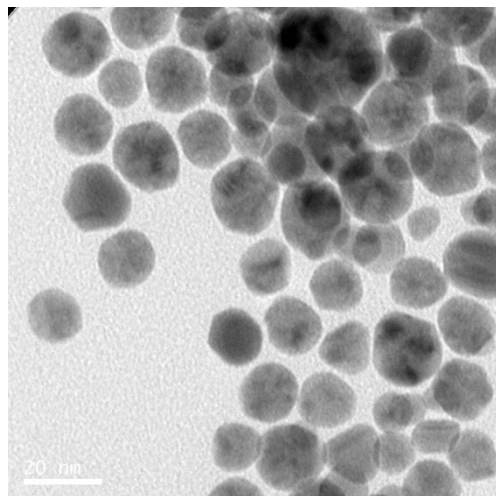

(c)

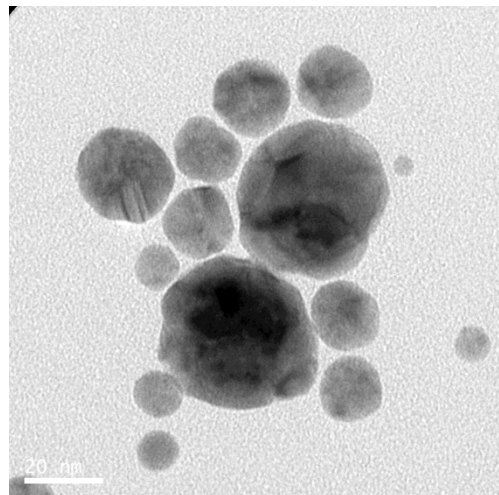

(d)

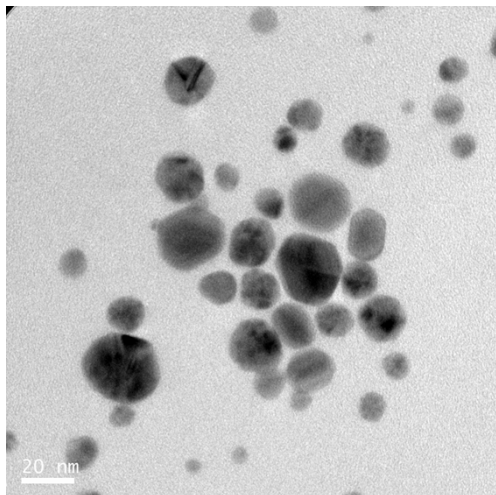

(e)

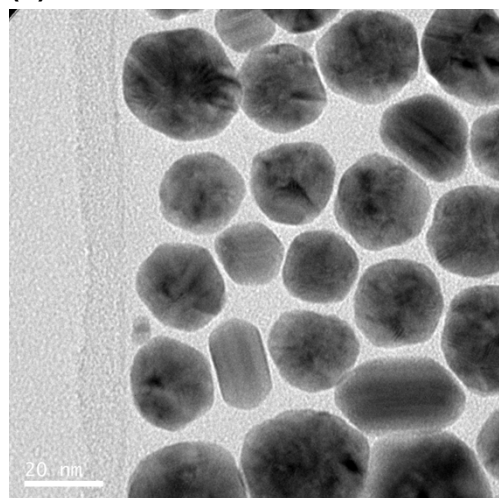

**Figure S4.** Exemplar TEM images of AgNP prepared using (a) 10 mM Tollens' and 25 mM (3),  $\varnothing = 15 \pm 4$  nm, (b) 20 mM Tollens' and 10 mM (3),  $\varnothing = 16 \pm 2$  nm, (c) 10 mM Tollens' and 25 mM (4a),  $\varnothing = 19 \pm 10$  nm, (d) 20 mM Tollens' and 10 mM (4a),  $\varnothing = 15 \pm 6$  nm and (e) 20 mM Tollens' and 10 mM (4b),  $\varnothing = 25 \pm 5$  nm.

## 5.0 Reaction kinetics of AgNP formation

**Time course:** 150  $\mu$ L of sugar solutions (3, 4a or 4b) at 20  $\mu$ M and 150  $\mu$ L of Tollens' solution (20 mM) were mixed in a low-volume quartz cuvette, UV-Vis measurements were taken at 400 nm every 5 seconds using a UV-Vis spectrophotometer.

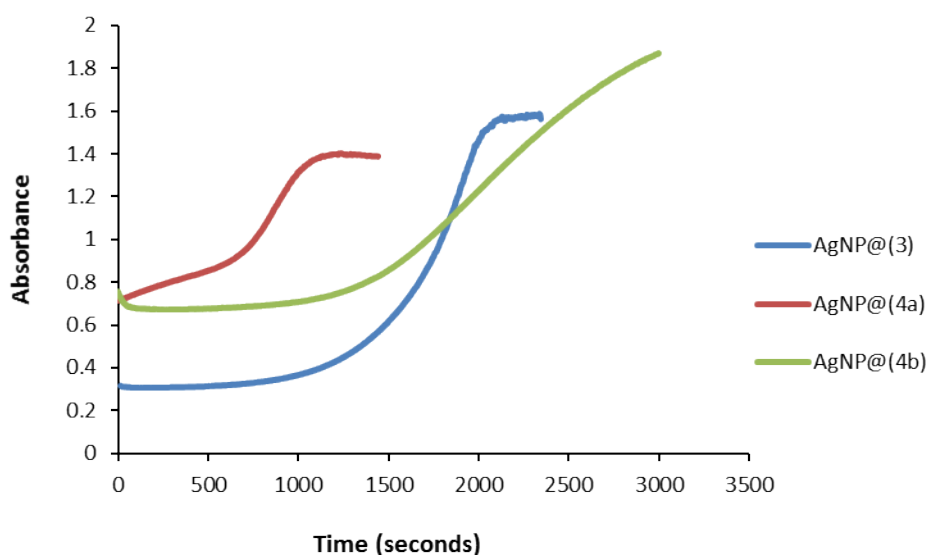

**Figure S5.** Kinetics of formation of AgNP using (3, blue), (4a, red) and (4b, green) as monitored by the formation of the SPR peak at 400nm.

## 6.0 $^1\text{H}$ NMR titration studies using ligands (**3**, **4a** and **4b**) with $\text{AgNO}_3$

Stock solutions of triazole ligands (**3**, **4a** or **4b**) at 2 mM and  $\text{AgNO}_3$  (12 mM) were prepared in  $\text{D}_2\text{O}$ . 300  $\mu\text{L}$  of aliquots of the ligands were mixed with increasing amounts of  $\text{AgNO}_3$  and diluted with  $\text{D}_2\text{O}$  up to 600  $\mu\text{L}$ . The recorded spectra are shown in Figures S6-8 and ordered at different concentrations of  $\text{AgNO}_3$  from 0 to 6 mM.

### 6.1 $^1\text{H}$ NMR titration studies of $\text{Ag(I)}$ -binding using ligand (**3**)

(a)

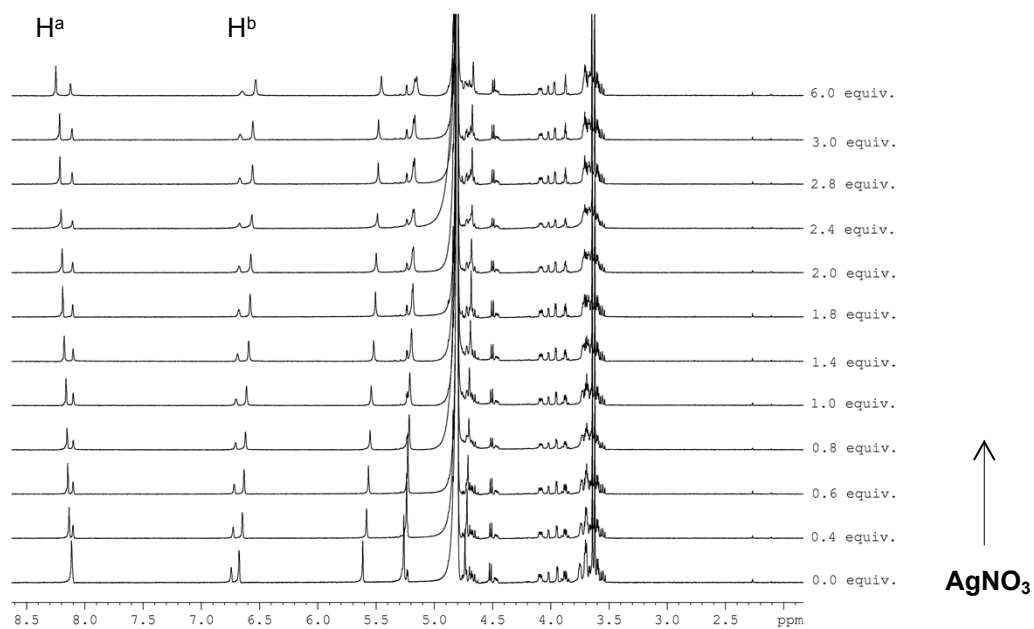

**(b)**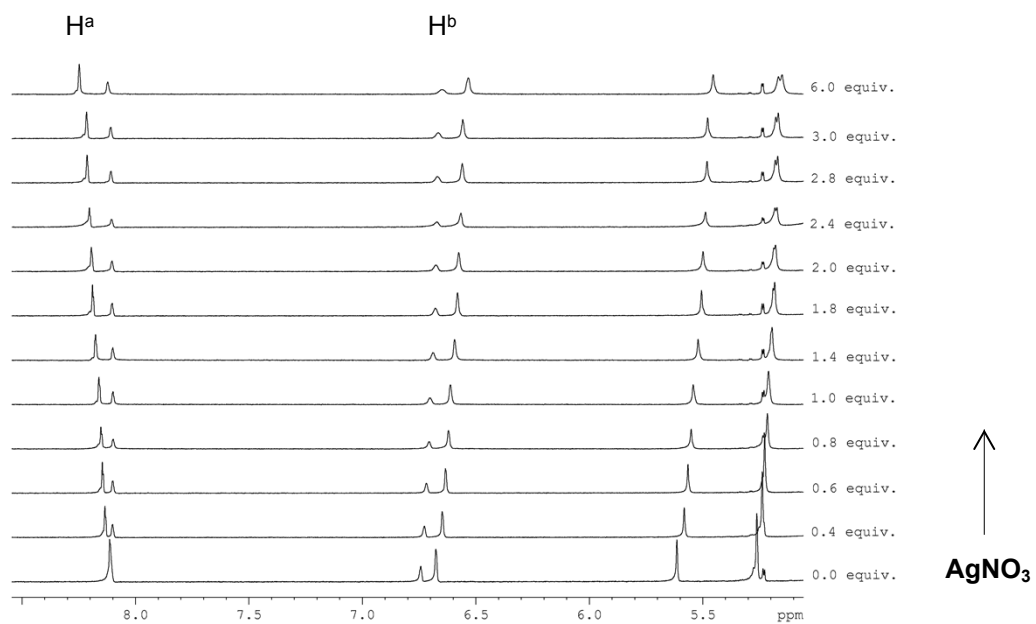

(c)

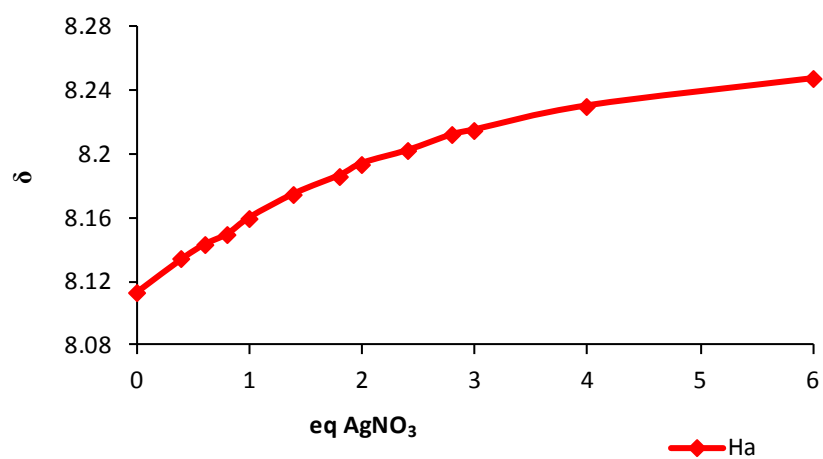

(d)

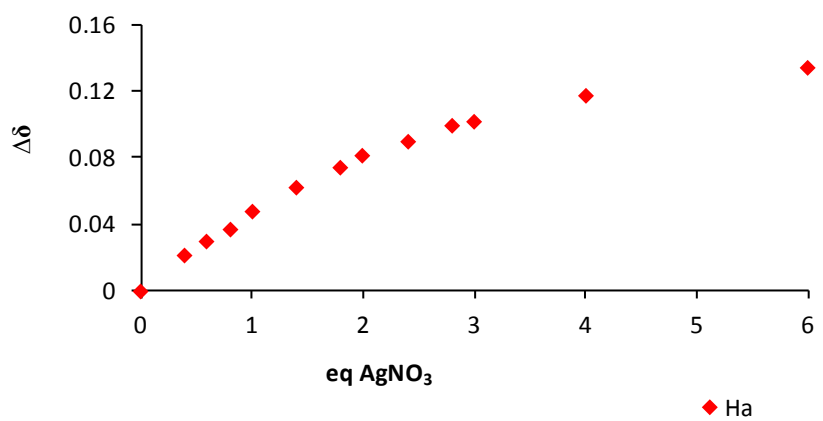

(e)

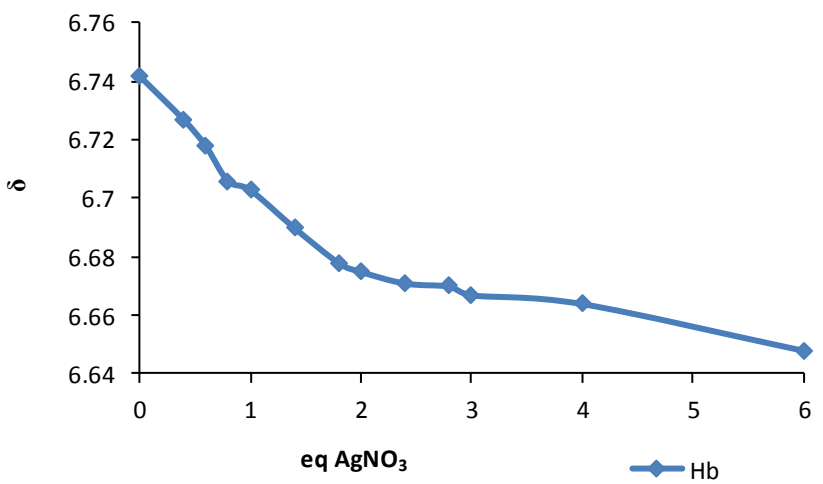

(f)

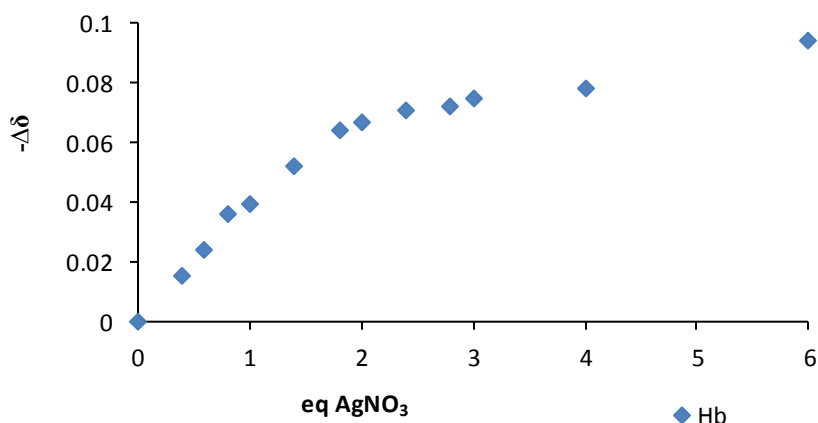

**Figure S6.** (a) Stack plot of  $^1\text{H}$ -NMR (500 MHz,  $\text{D}_2\text{O}$ ) of (3) (stock concentration 2 mM) with an increasing amount of  $\text{AgNO}_3$ . (b) Stack plot of selected areas  $^1\text{H}$ -NMR (500 MHz,  $\text{D}_2\text{O}$ ) of (3) (2 mM) with an increasing amount of  $\text{AgNO}_3$ . (c) Plot of the  $^1\text{H}$ -NMR titration of  $\text{H}^a$  with  $\text{AgNO}_3$  in  $\text{D}_2\text{O}$ . (d) Change in chemical shift of  $\text{H}^a$  as a function of  $\text{AgNO}_3$ . (e) Plot of the  $^1\text{H}$ -NMR titration of  $\text{H}^b$  with  $\text{AgNO}_3$  in  $\text{D}_2\text{O}$ . (f) Change in chemical shift of  $\text{H}^b$  as a function of  $\text{AgNO}_3$ .

## 6.2 $^1\text{H}$ NMR titration studies of $\text{Ag}(\text{I})$ -binding using ligand (4a)

(a)

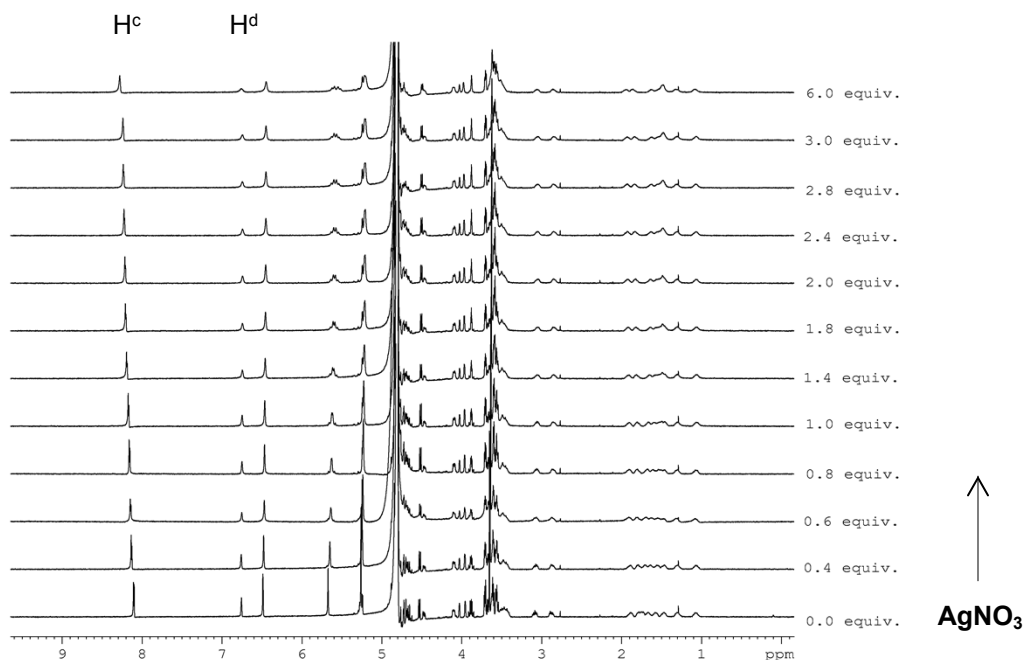

**(b)**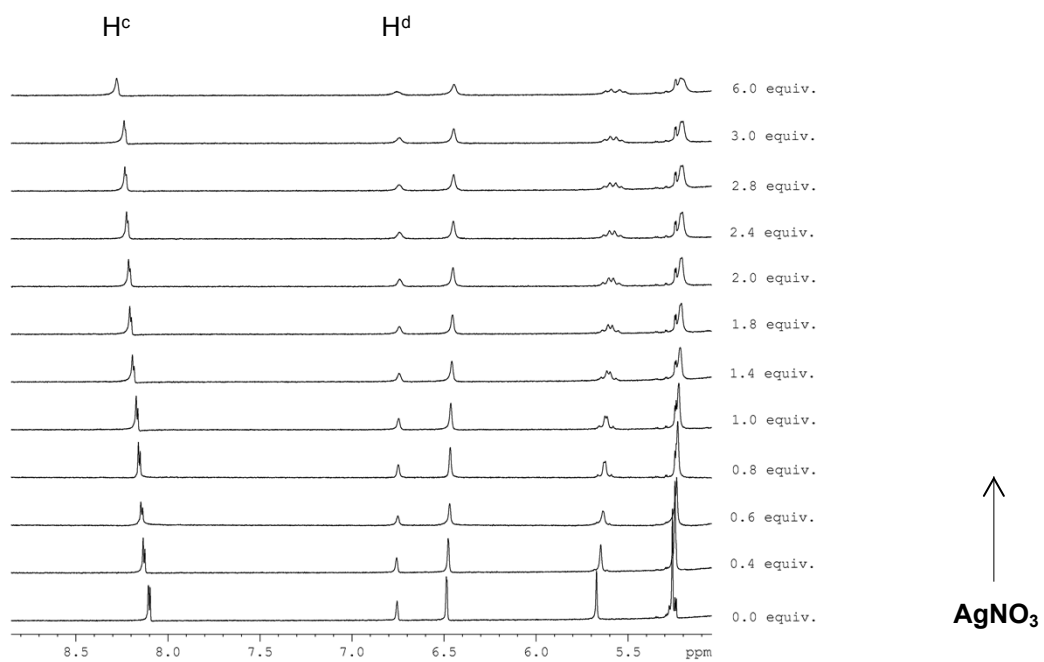



(c)

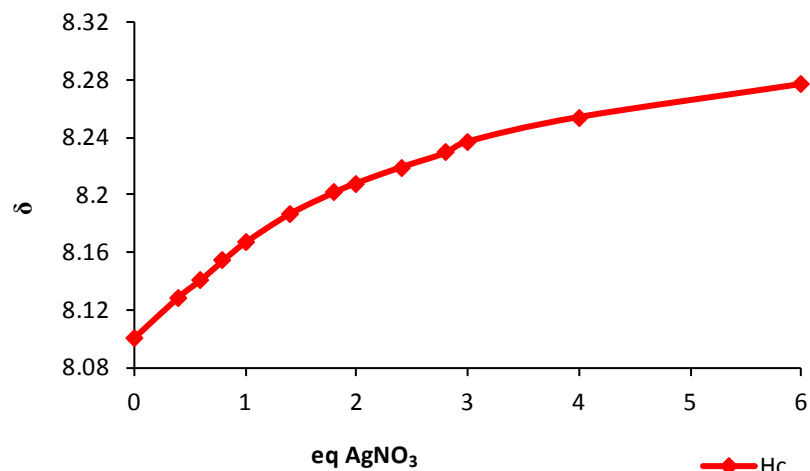

(d)

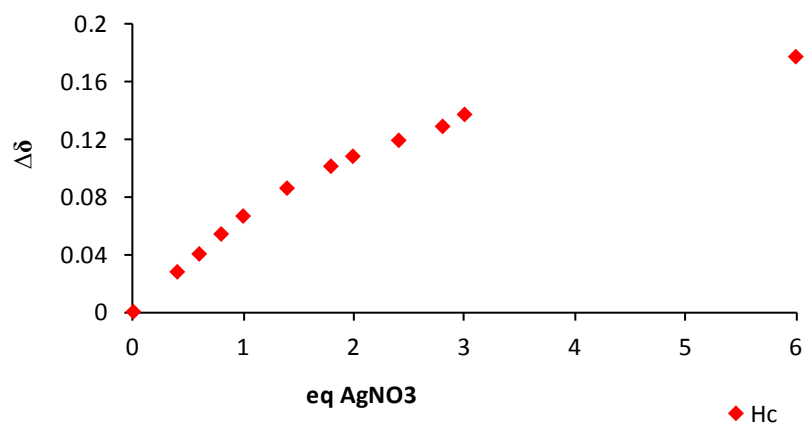

(e)

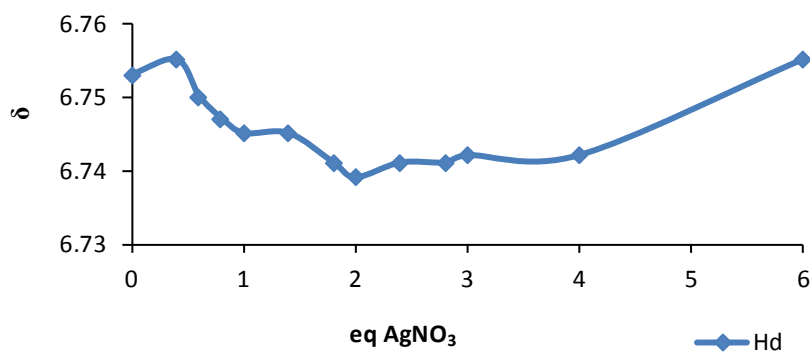

(f)

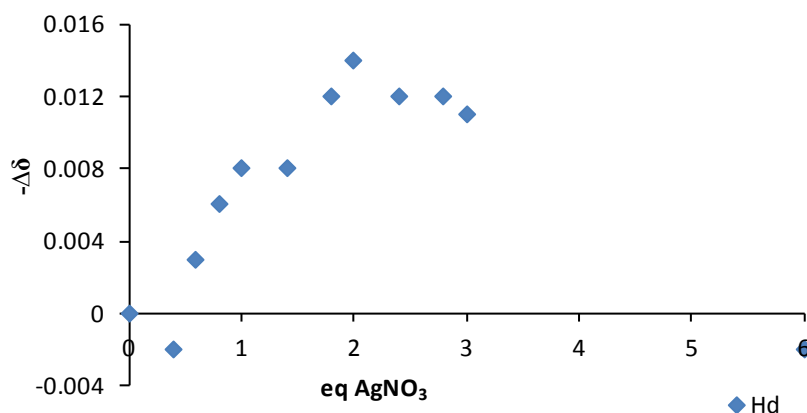

**Figure S7.** (a) Stack plot of  $^1\text{H}$ -NMR (500 MHz,  $\text{D}_2\text{O}$ ) of (**4a**) (stock concentration 2 mM) with an increasing amount of  $\text{AgNO}_3$ . (b) Stack plot of selected areas  $^1\text{H}$ -NMR (500 MHz,  $\text{D}_2\text{O}$ ) of (**4a**) (2 mM) with an increasing amount of  $\text{AgNO}_3$ . (c) Plot of the  $^1\text{H}$ -NMR titration of  $\text{H}^c$  with  $\text{AgNO}_3$  in  $\text{D}_2\text{O}$ . (d) Change in chemical shift of  $\text{H}^c$  as a function of  $\text{AgNO}_3$ . (e) Plot of the  $^1\text{H}$ -NMR titration of  $\text{H}^d$  with  $\text{AgNO}_3$  in  $\text{D}_2\text{O}$ . (f) Change in chemical shift of  $\text{H}^d$  as a function of  $\text{AgNO}_3$ .

### 6.3 $^1\text{H}$ NMR titration studies of $\text{Ag(I)}$ -binding using ligand (**4b**)

(a)

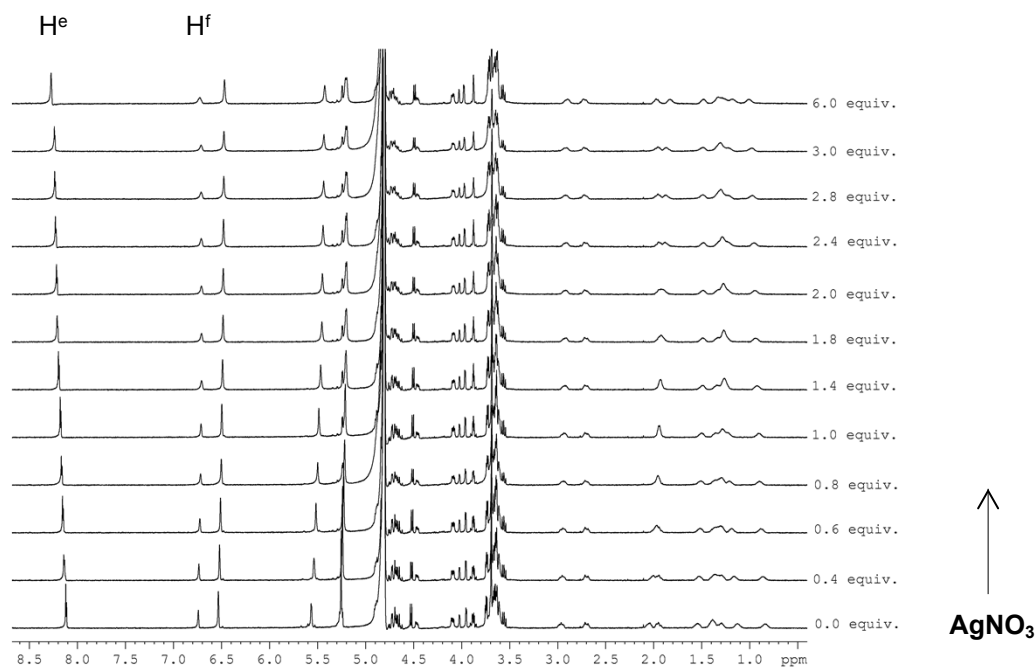

(b)

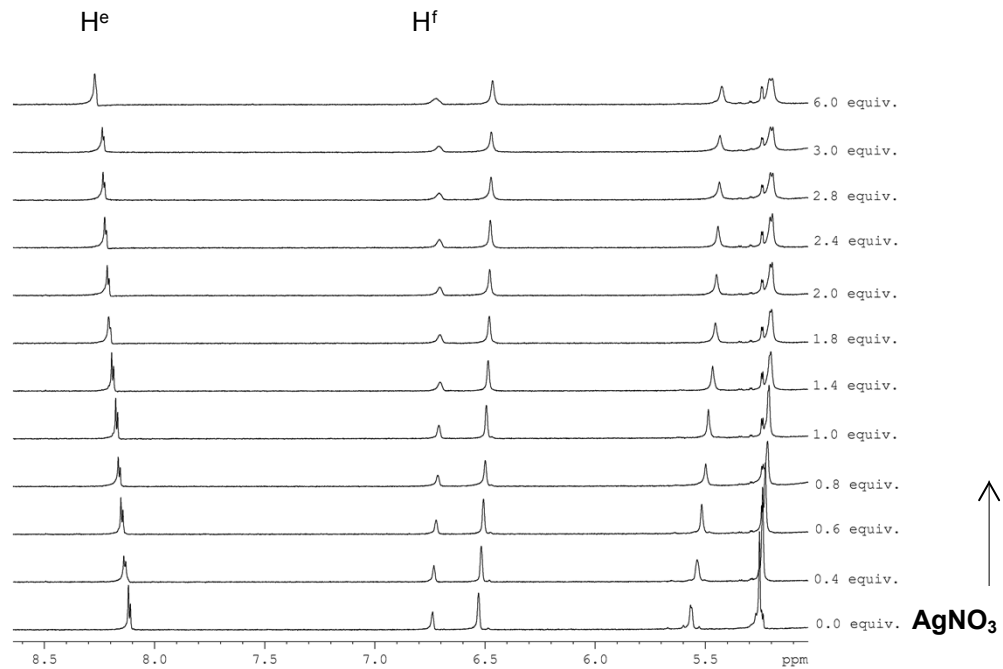

(c)

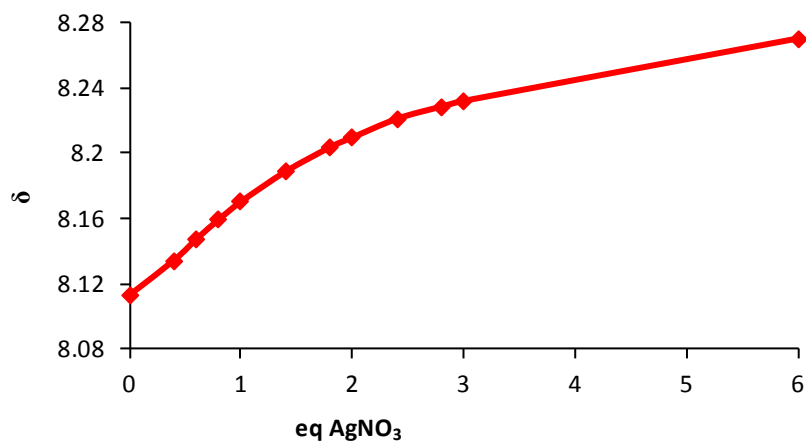

(d)

—◆—  $\text{H}^e$

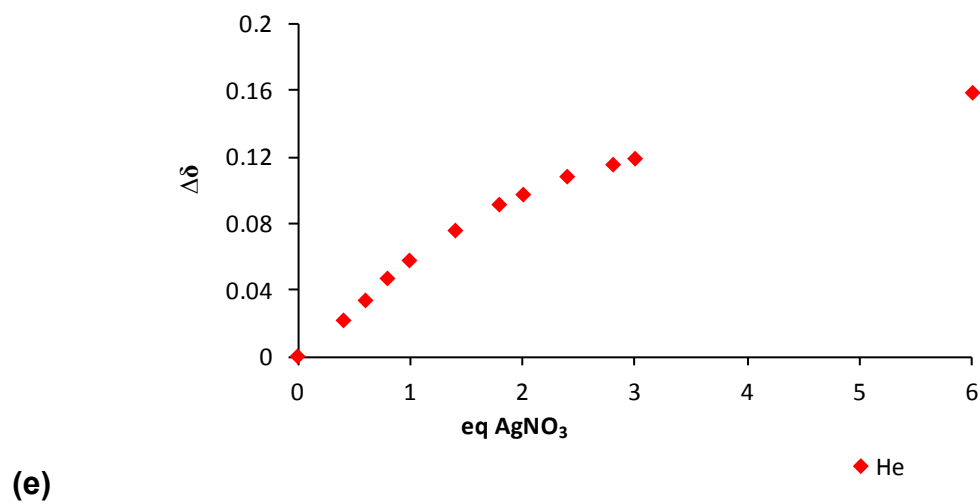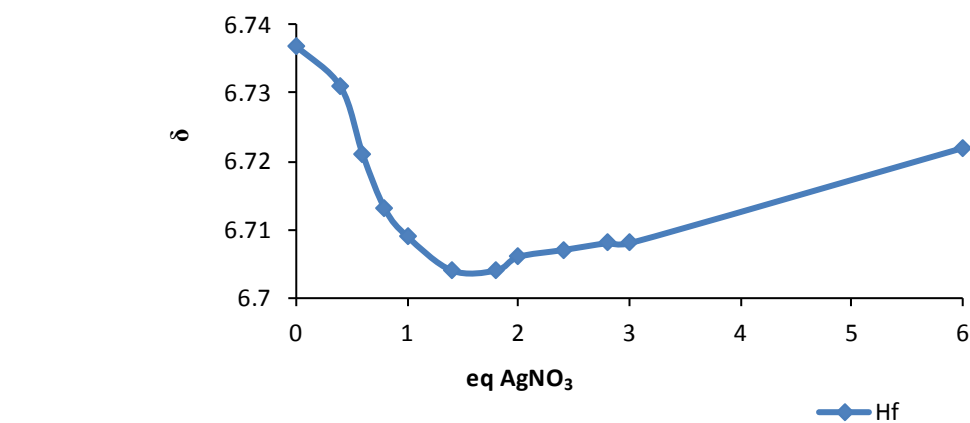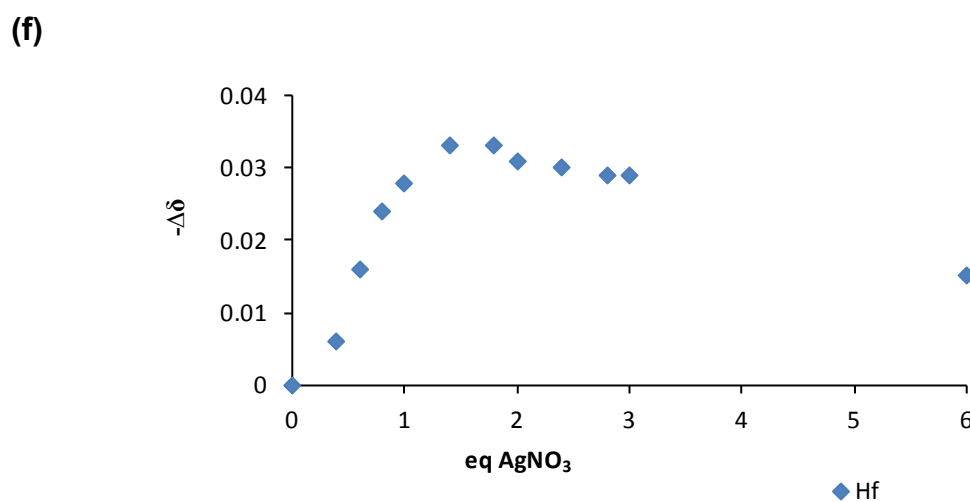

**Figure S8.** (a) Stack plot of  $^1\text{H}$ -NMR (500 MHz,  $\text{D}_2\text{O}$ ) of (**4b**) (stock concentration 2 mM) with an increasing amount of  $\text{AgNO}_3$ . (b) Stack plot of selected areas  $^1\text{H}$ -NMR (500 MHz,  $\text{D}_2\text{O}$ ) of (**4b**) (2 mM) with an

increasing amount of  $\text{AgNO}_3$ . (c) Plot of the  $^1\text{H}$ -NMR titration of  $\text{H}^e$  with  $\text{AgNO}_3$  in  $\text{D}_2\text{O}$ . (d) Change in chemical shift of  $\text{H}^e$  as a function of  $\text{AgNO}_3$ . (e) Plot of the  $^1\text{H}$ -NMR titration of  $\text{H}^f$  with  $\text{AgNO}_3$  in  $\text{D}_2\text{O}$ . (f) Change in chemical shift of  $\text{H}^f$  as a function of  $\text{AgNO}_3$ .

## 7.0 Calculation of the Ag(I) binding constant

The binding affinity of Ag(I) for ligands (**3**, **4a** and **4b**) was calculated by non-linear least squares fitting. The acquired  $^1\text{H}$  NMR data of the downfield shift observed for the triazole protons and the concentration of the Ag(I) was used to calculate the Ag(I) binding constants using WinEQNMR2 software.<sup>[4]</sup>

(a)

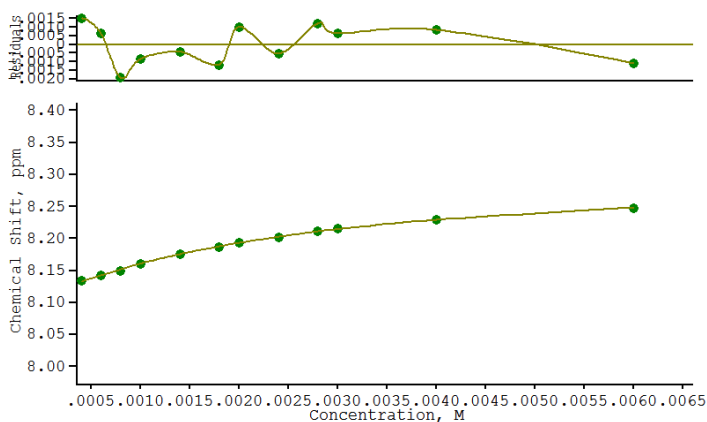

(b)

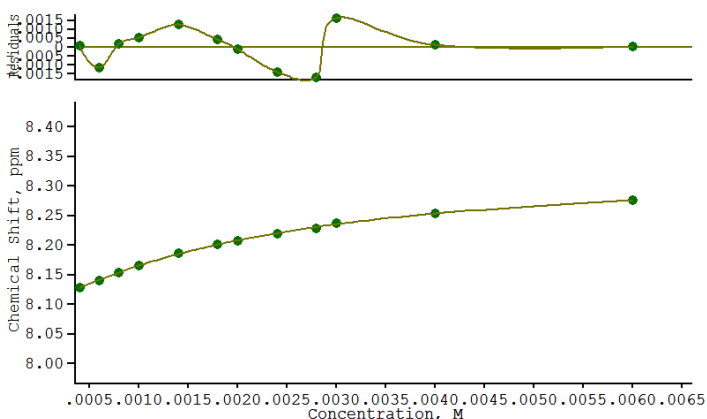

(c)

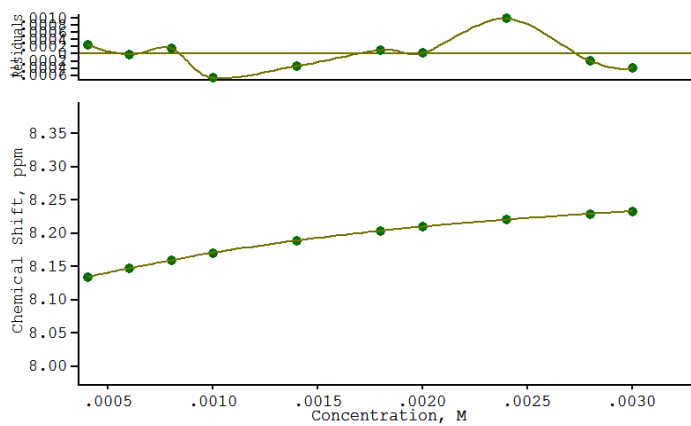

**Figure S9.** Plots of the experimental points and the calculated best fit line against concentration of titrant Ag using (a) (3), (b) (4a) and (c) (4b).

## 8.0 Stability of AgNP@(3), AgNP@(4a) and AgNP@(4b) in salt buffer

(a)

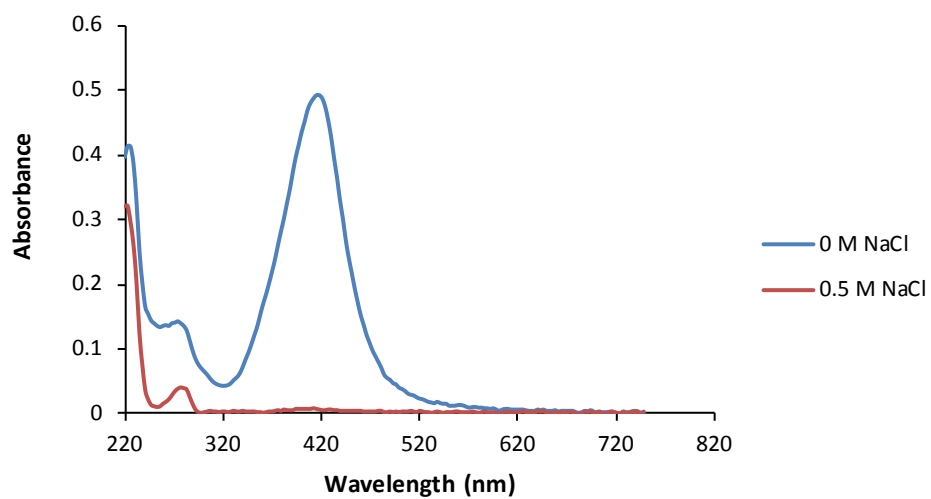

(b)

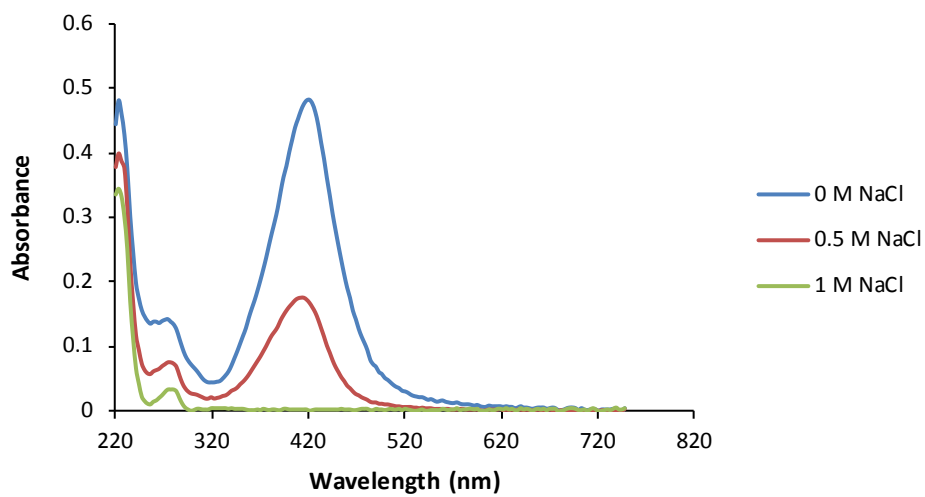

(c)

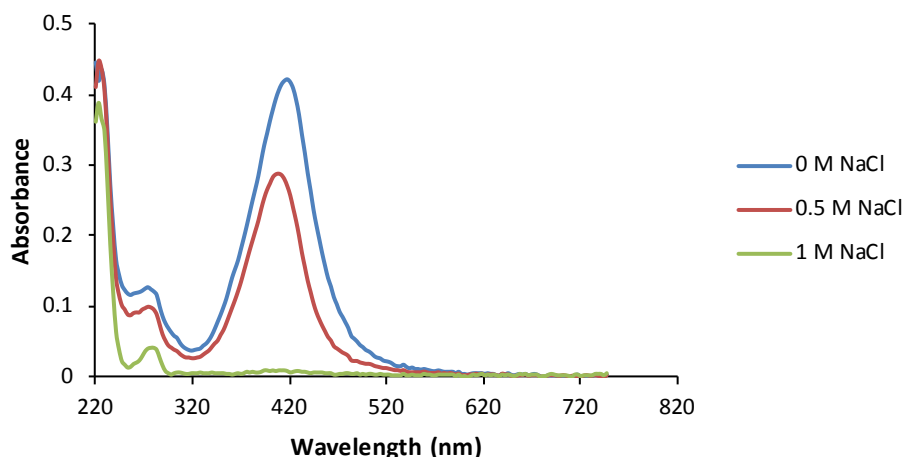

**Figure S 10.** Stability of (a) AgNP@(3), (b) AgNP@(4a) and (c) AgNP@(4b) to increasing concentrations of an aqueous solution of NaCl.

## 9.0 Surface Enhanced Raman scattering

Below outlines the procedure used for detection of both malachite green (MG) and malachite green isothiocyanate (MGITC) at concentrations of 100 nM. The same experimental was also used in the generation of concentration plots relating to MGITC.

The solution of prepared nanoparticle was diluted 1:200 with double distilled deionised H<sub>2</sub>O. 15  $\mu$ L of MG or MGITC was added to a well followed by 25  $\mu$ L of double distilled deionised H<sub>2</sub>O and 100  $\mu$ L of the diluted nanoparticles. This solution was thoroughly aspirated and 10  $\mu$ L of 0.1 M spermine hydrochloride was added and the nanoparticles allowed to aggregate for 1 minute before immediate SERS analysis. Analysis was carried out using an Avalon Ramanstation spectrometer (PerkinElmer, Waltham, MA). The system is equipped with a 100 mW 532 nm diode laser. All measurements were collected for 10 s using a resolution of 2 cm<sup>-1</sup> over a range of 200-2500 wavenumbers.



**(a)**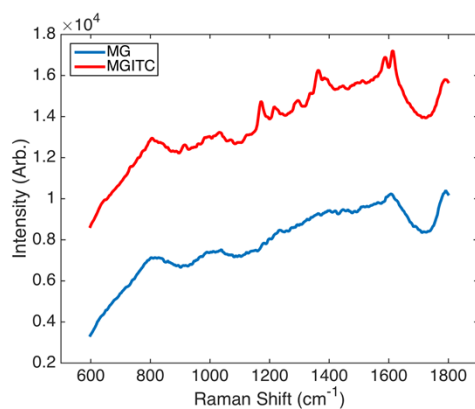**(b)**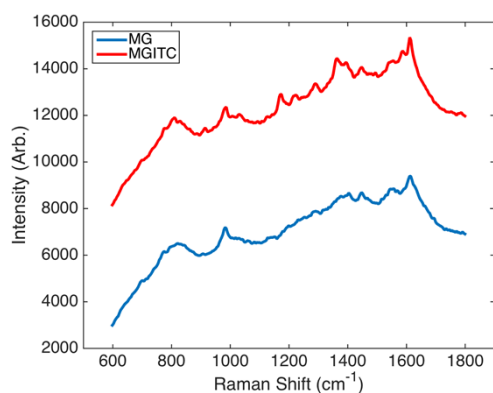**(c)**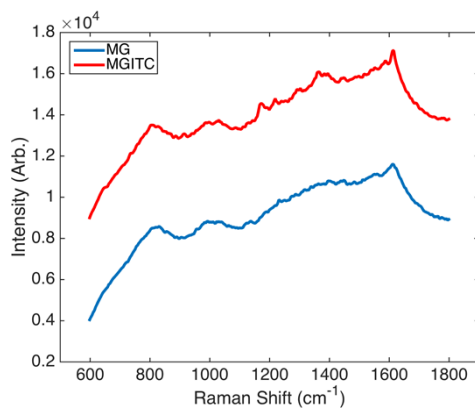

**Figure S11.** Stacked plots comparing the SERRS signal of MG and MGITC (both 100 nM) exhibited using **(a)** AgNP@**(3)**, **(b)** AgNP@**(4a)**, **(c)** AgNP@**(4b)**.

## 10.0 HRMS, HPLC, $^1\text{H}$ and $^{13}\text{C}$ NMR spectra

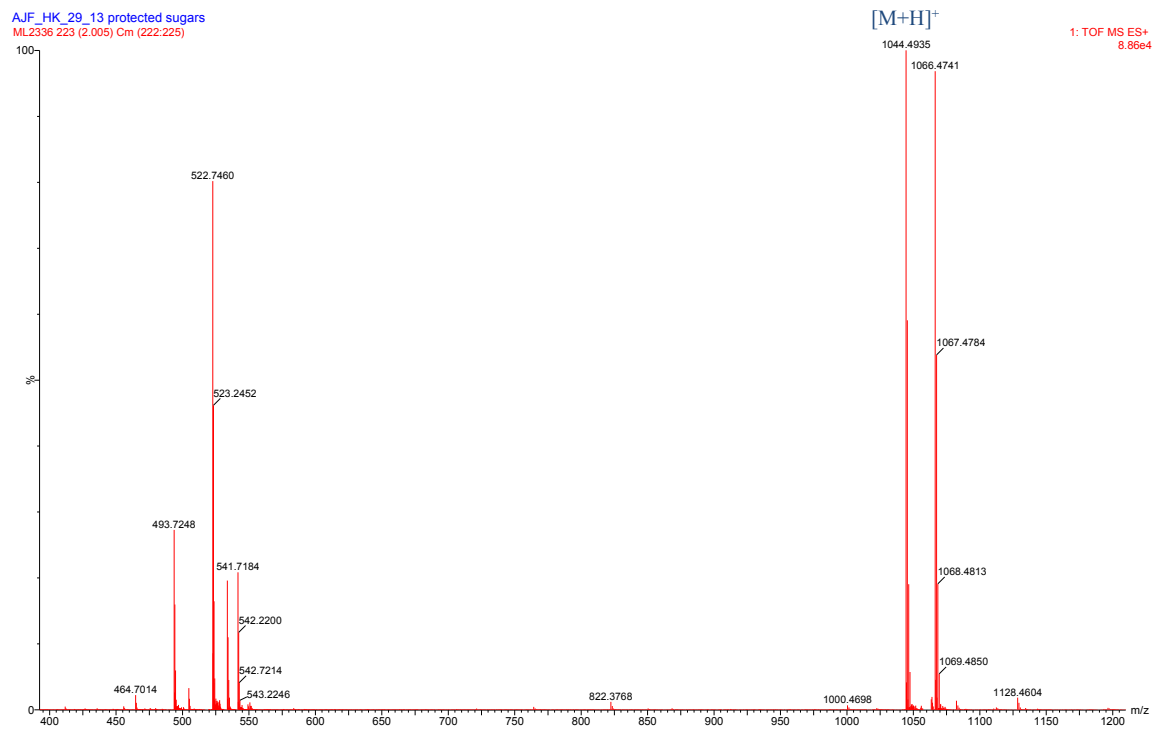

**Figure S12.** HRMS (ESI) spectra of compound (S1).

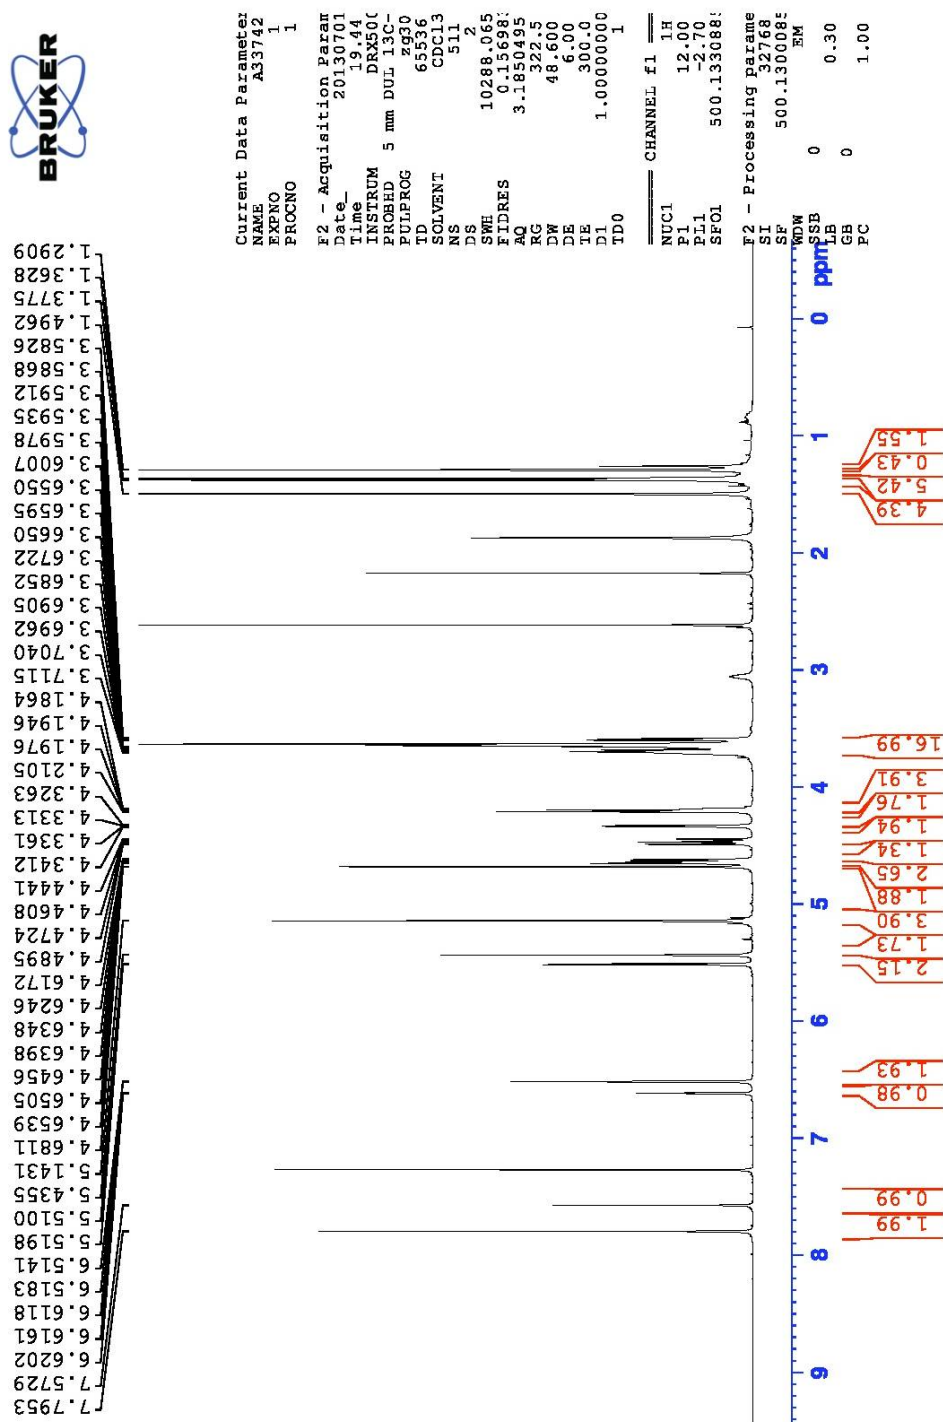

**Figure S13.**  $^1\text{H}$  NMR spectrum of compound (S1).

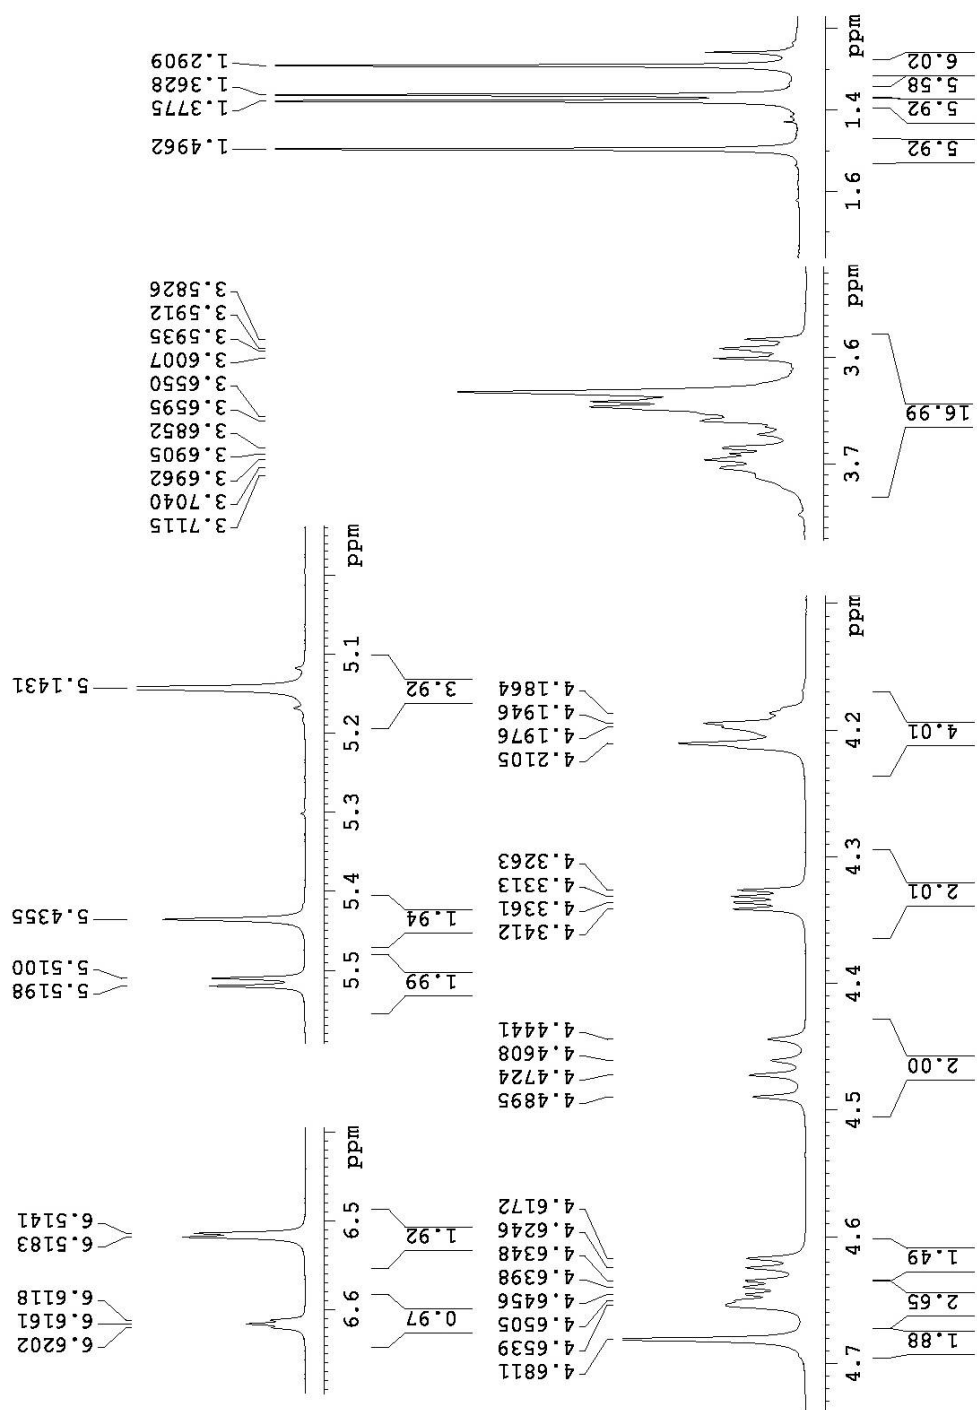

**Figure S14.** Selected areas  $^1\text{H}$  NMR of compound (**S1**).

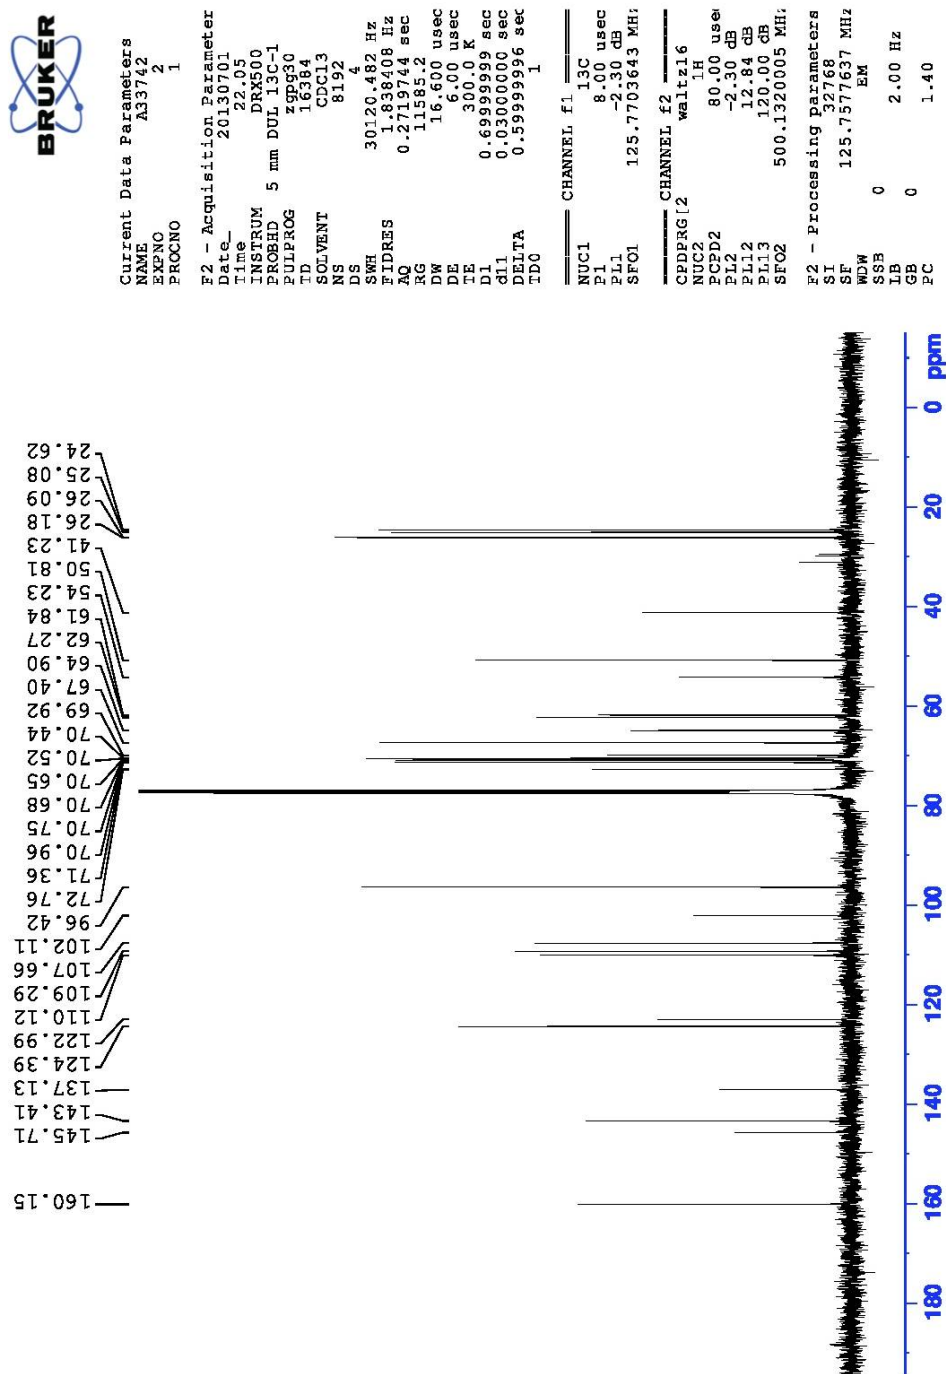Figure S15.  $^{13}\text{C}$  NMR spectrum of compound (S1).

Operator:Administrator Timebase:analyticalhplc Sequence:HK-29\_after deprotection

Page 1-1  
21/2/2015 5:48 PM**2 HK-29 aftwer deprotection 1st-2nd-3rd first fr\_4th inj**

|                  |                                                        |                   |          |
|------------------|--------------------------------------------------------|-------------------|----------|
| Sample Name:     | HK-29 aftwer deprotection 1st-2nd-3rd first fr_4th inj | Injection Volume: | 20.0     |
| Vial Number:     | RA2                                                    | Channel:          | UV_VIS_1 |
| Sample Type:     | unknown                                                | Wavelength:       | 220      |
| Control Program: | poly-p4 28min +230nm                                   | Bandwidth:        | 10       |
| Quantif. Method: | dna method                                             | Dilution Factor:  | 1.0000   |
| Recording Time:  | 3/7/2013 17:32                                         | Sample Weight:    | 1.0000   |
| Run Time (min):  | 24.00                                                  | Sample Amount:    | 1.0000   |

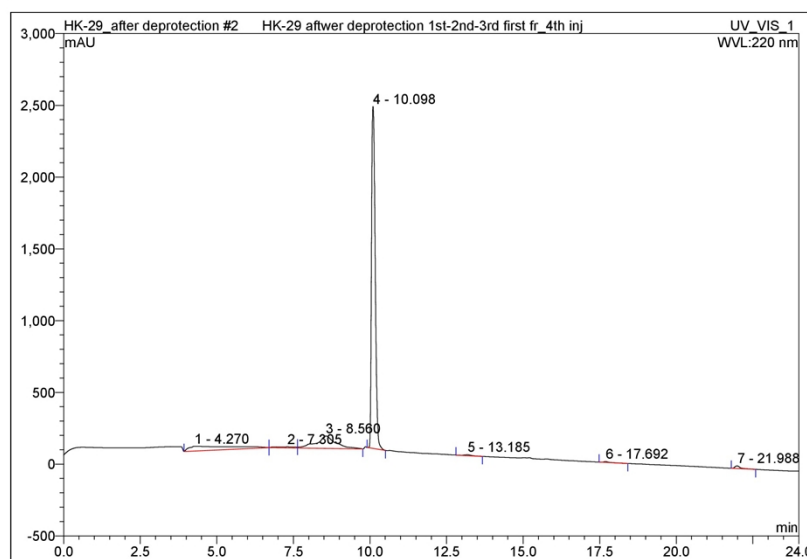

| No.           | Ret.Time<br>min | Peak Name | Height<br>mAU | Area<br>mAU*min | Rel.Area<br>% | Amount | Type |
|---------------|-----------------|-----------|---------------|-----------------|---------------|--------|------|
| 1             | 4.27            | n.a.      | 32.958        | 49.937          | 10.92         | n.a.   | BMB  |
| 2             | 7.31            | n.a.      | 6.678         | 5.158           | 1.13          | n.a.   | bM   |
| 3             | 8.56            | n.a.      | 85.808        | 63.372          | 13.86         | n.a.   | MB   |
| 4             | 10.10           | n.a.      | 2382.633      | 332.268         | 72.66         | n.a.   | BMB  |
| 5             | 13.19           | n.a.      | 6.096         | 1.637           | 0.36          | n.a.   | BMB  |
| 6             | 17.69           | n.a.      | 6.034         | 1.129           | 0.25          | n.a.   | BMB  |
| 7             | 21.99           | n.a.      | 18.242        | 3.809           | 0.83          | n.a.   | BMB  |
| <b>Total:</b> |                 |           | 2538.449      | 457.310         | 100.00        | 0.000  |      |

default/Integration

Chromeleon (c) Dionex 1996-2006  
Version 6.80 SP4 Build 2361 (130805)**Figure S16.** HPL chromatogram of compound (3).

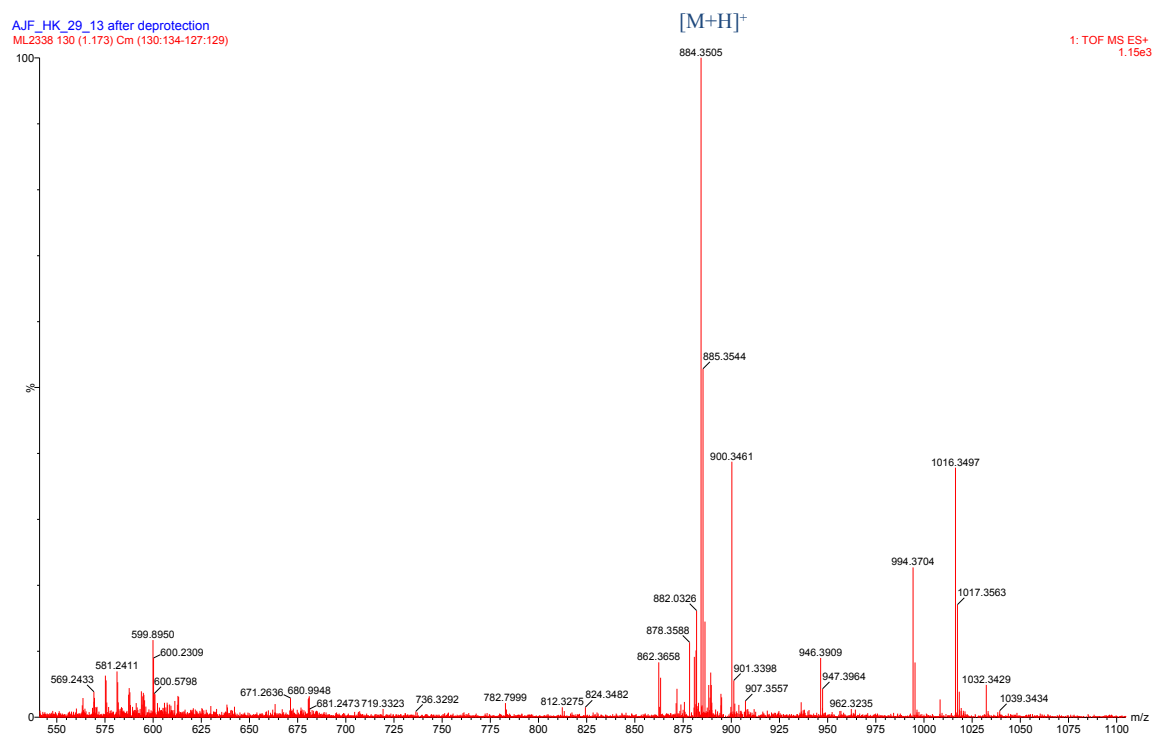

**Figure S17.** HRMS (ESI) spectra of compound (**3**).

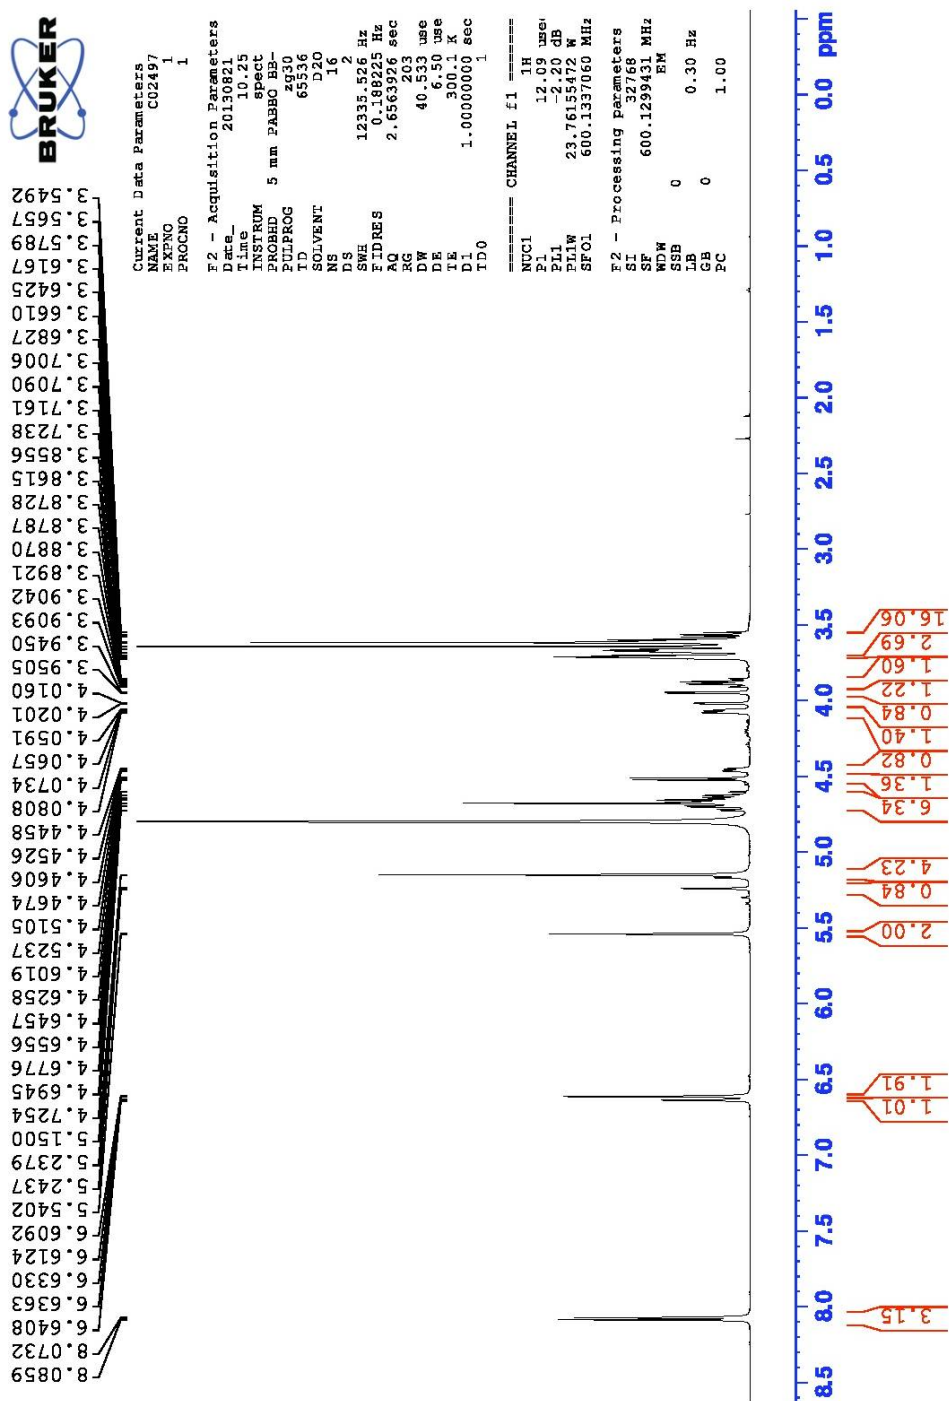Figure S18. <sup>1</sup>H NMR spectrum of compound (3).



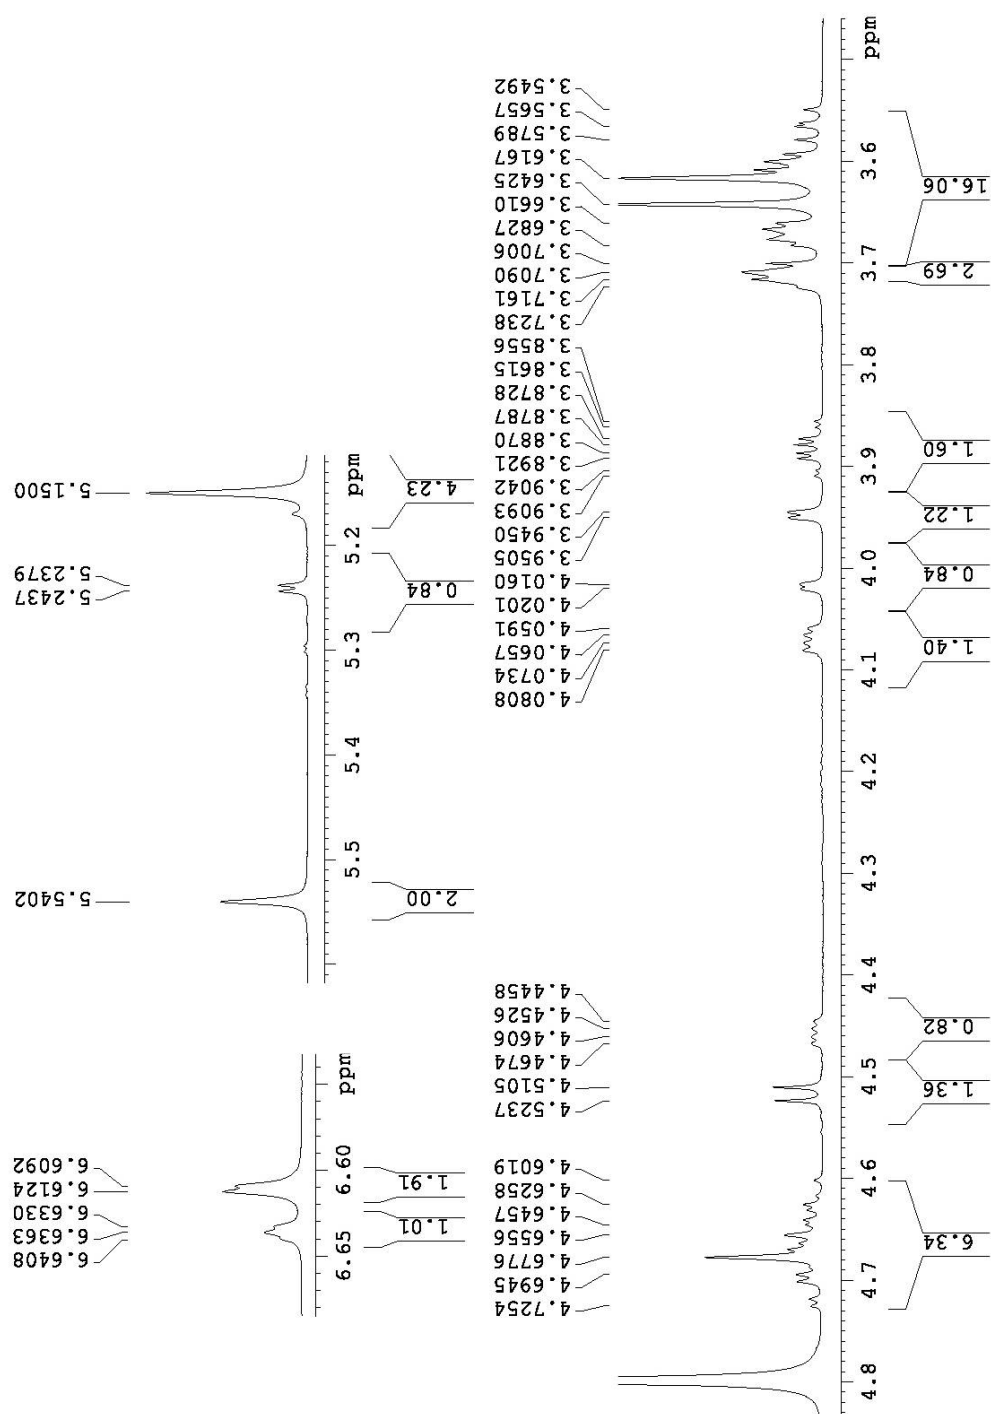

Figure S19. Selected areas  $^1\text{H}$  NMR of compound (3).

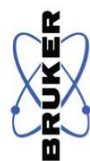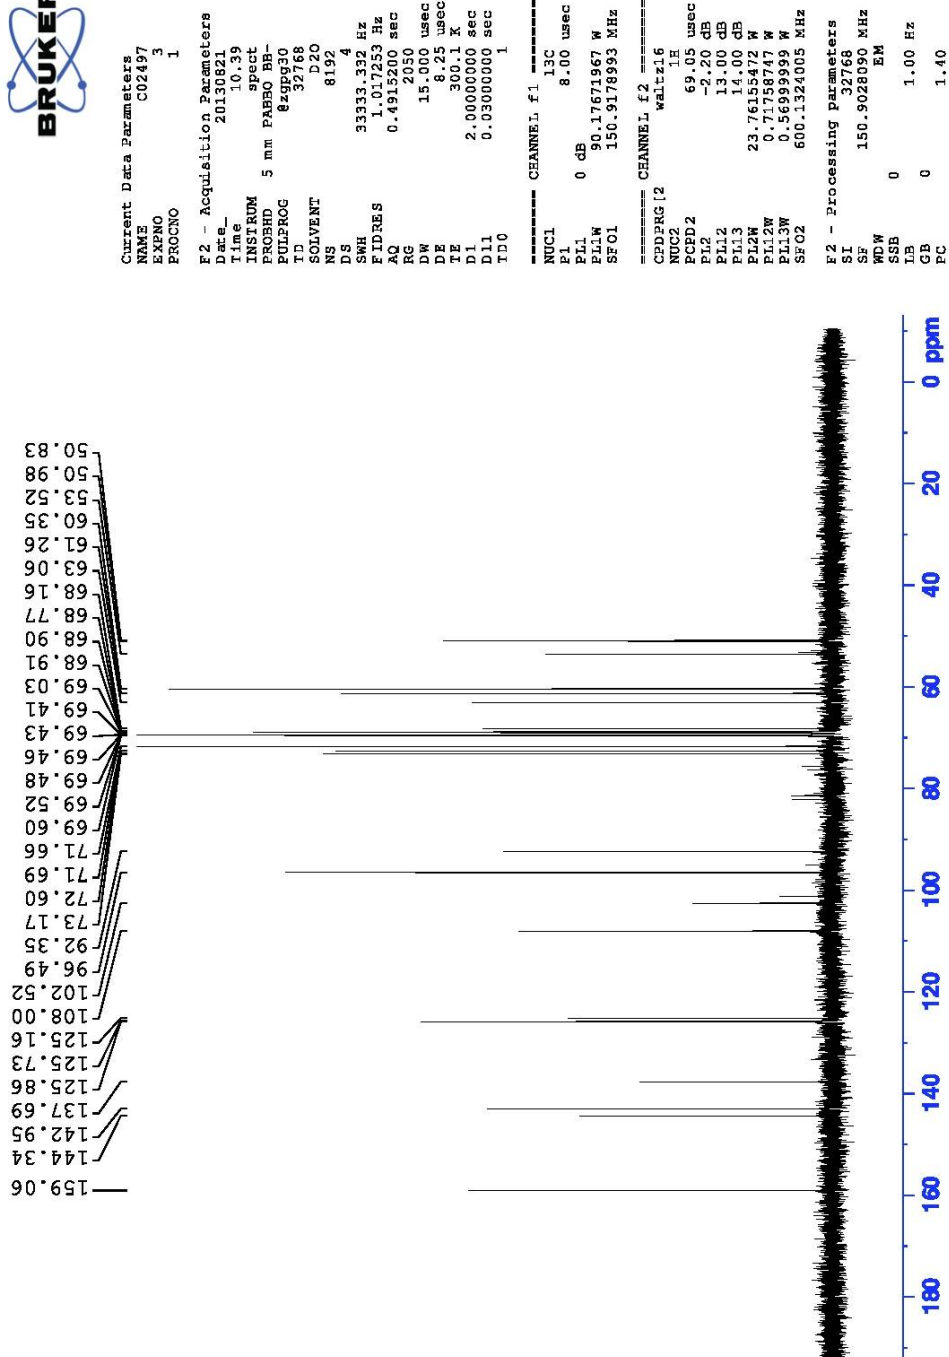

Figure S20.  $^{13}\text{C}$  NMR spectrum of compound (3).

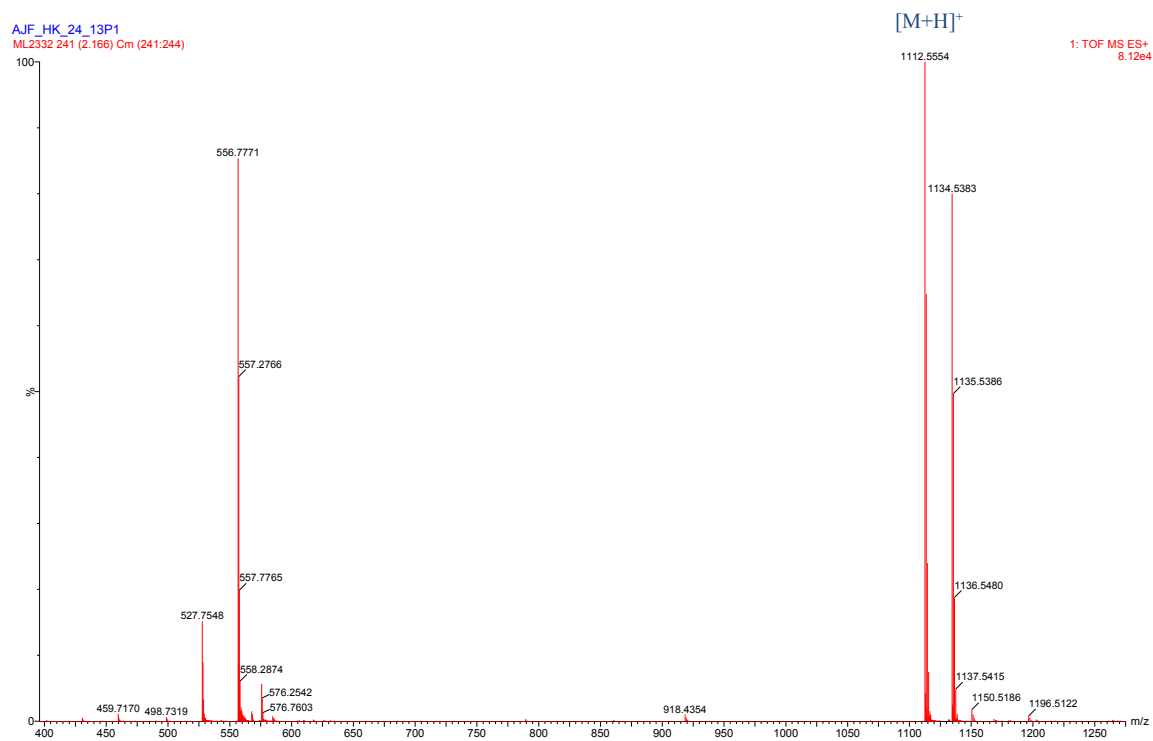

**Figure S21.** HRMS (ESI) spectra of compound (**S2a**).

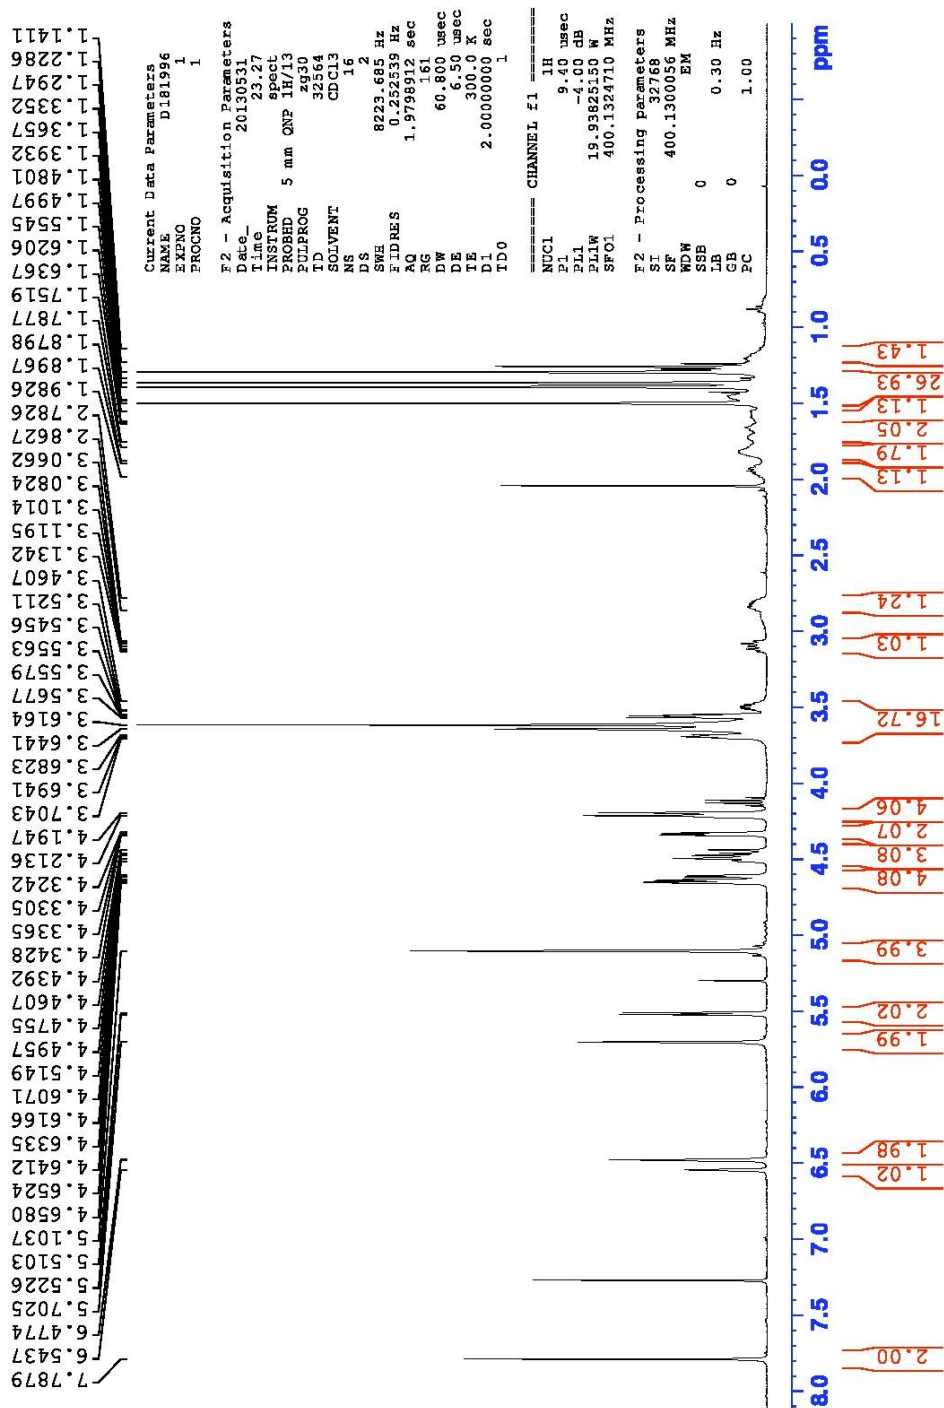Figure S22. <sup>1</sup>H NMR spectrum of compound (S2a).

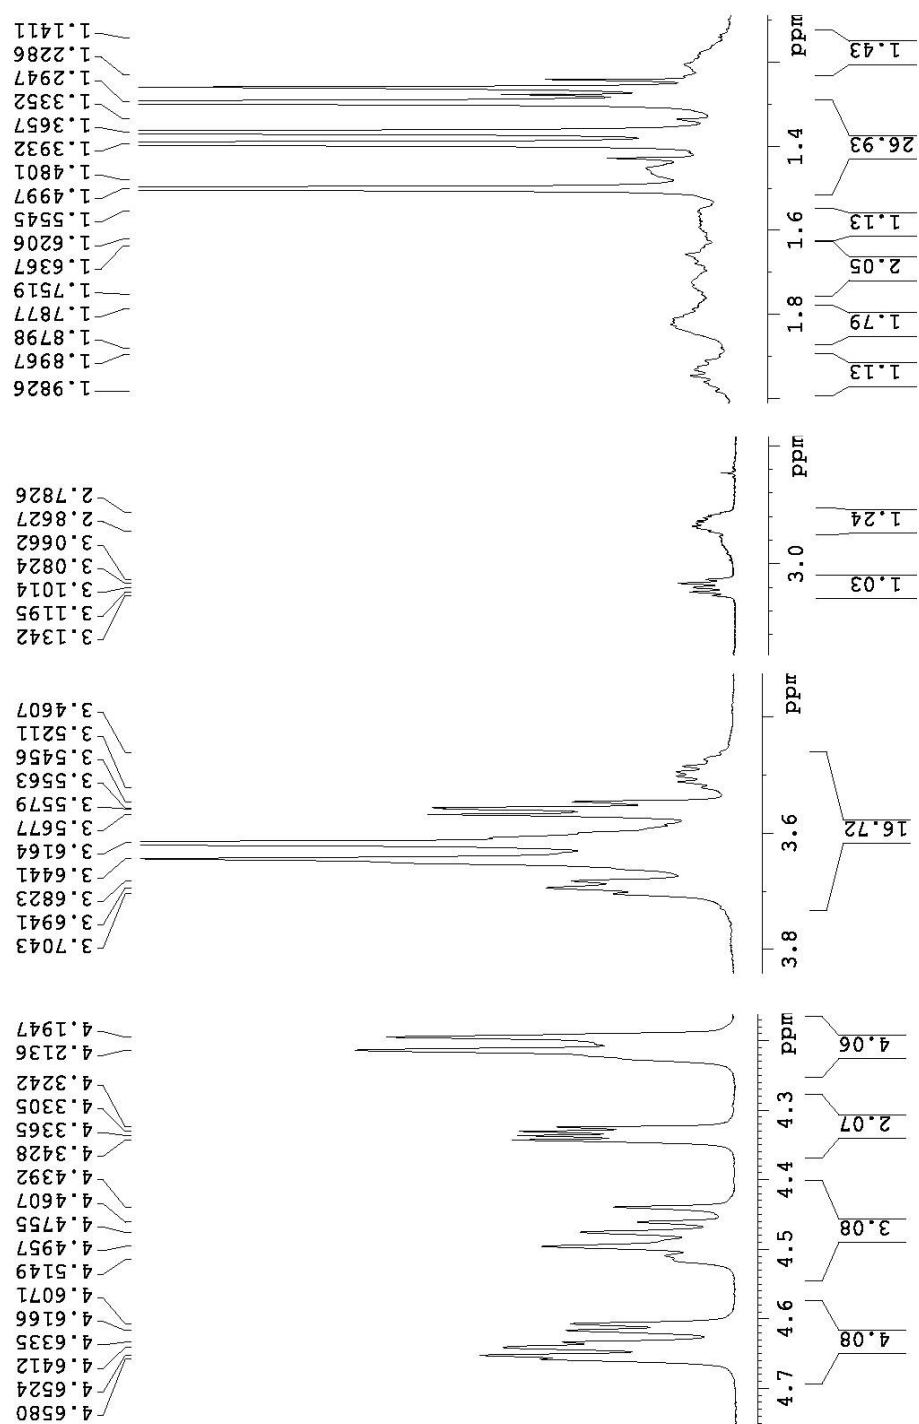

Figure S23. Selected areas  $^1\text{H}$  NMR of compound (S2a).

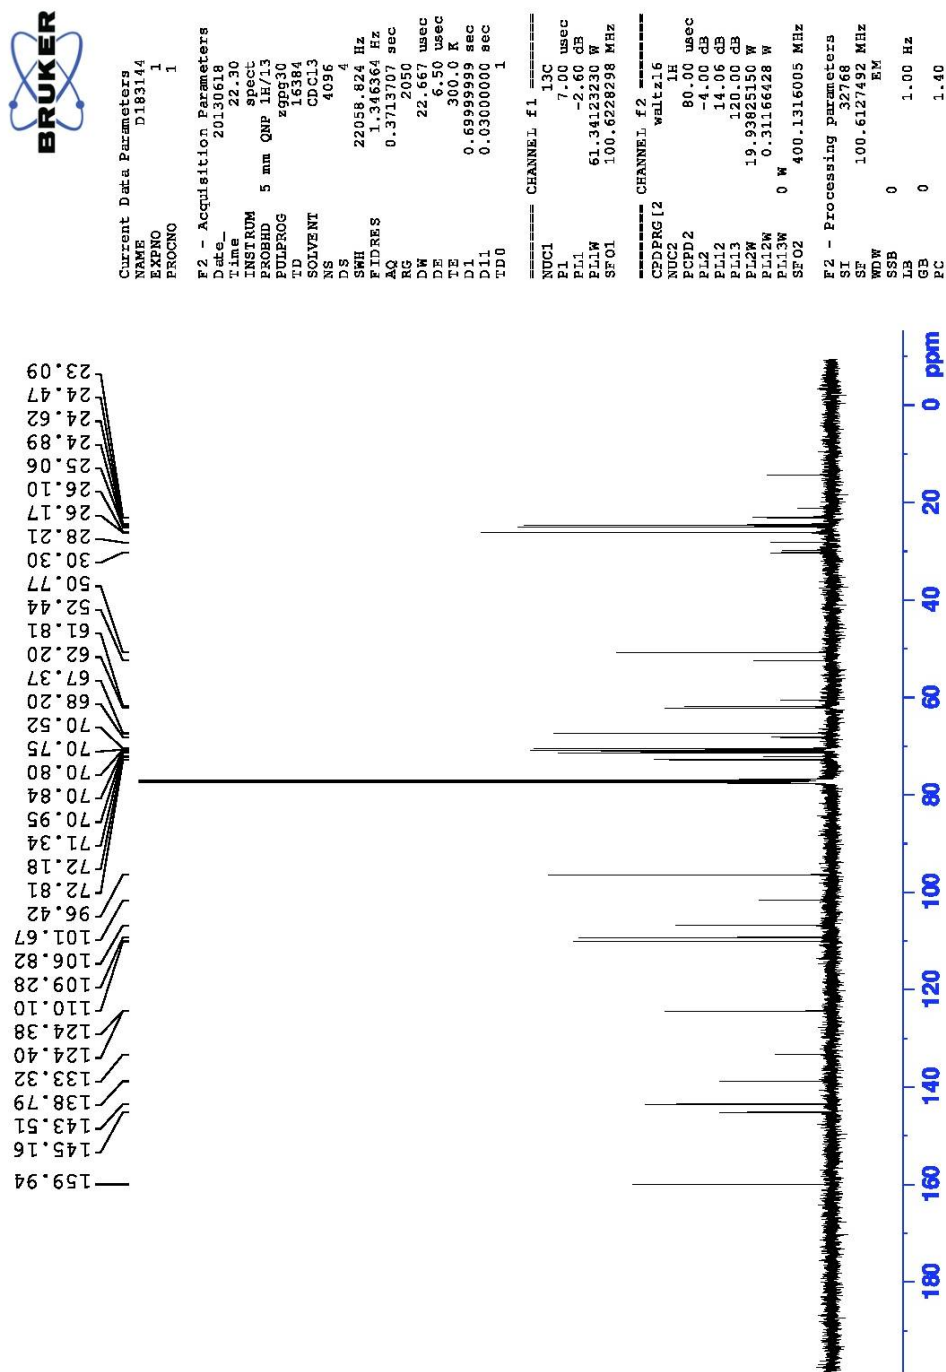

Figure S24.  $^{13}\text{C}$  NMR spectrum of compound (S2a).

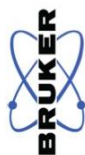

43

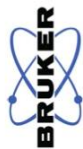

44



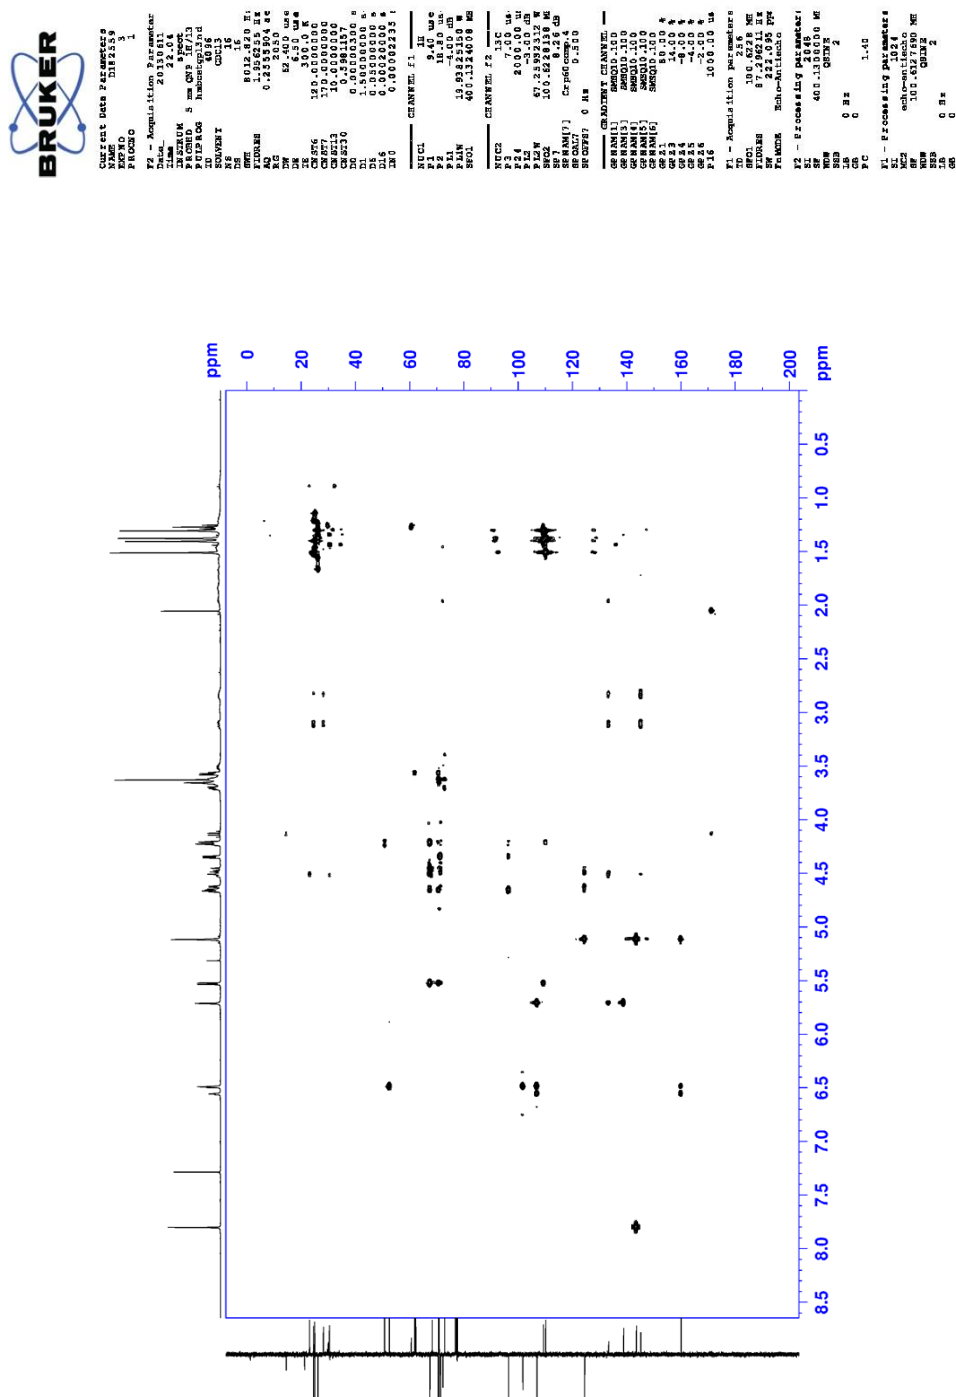

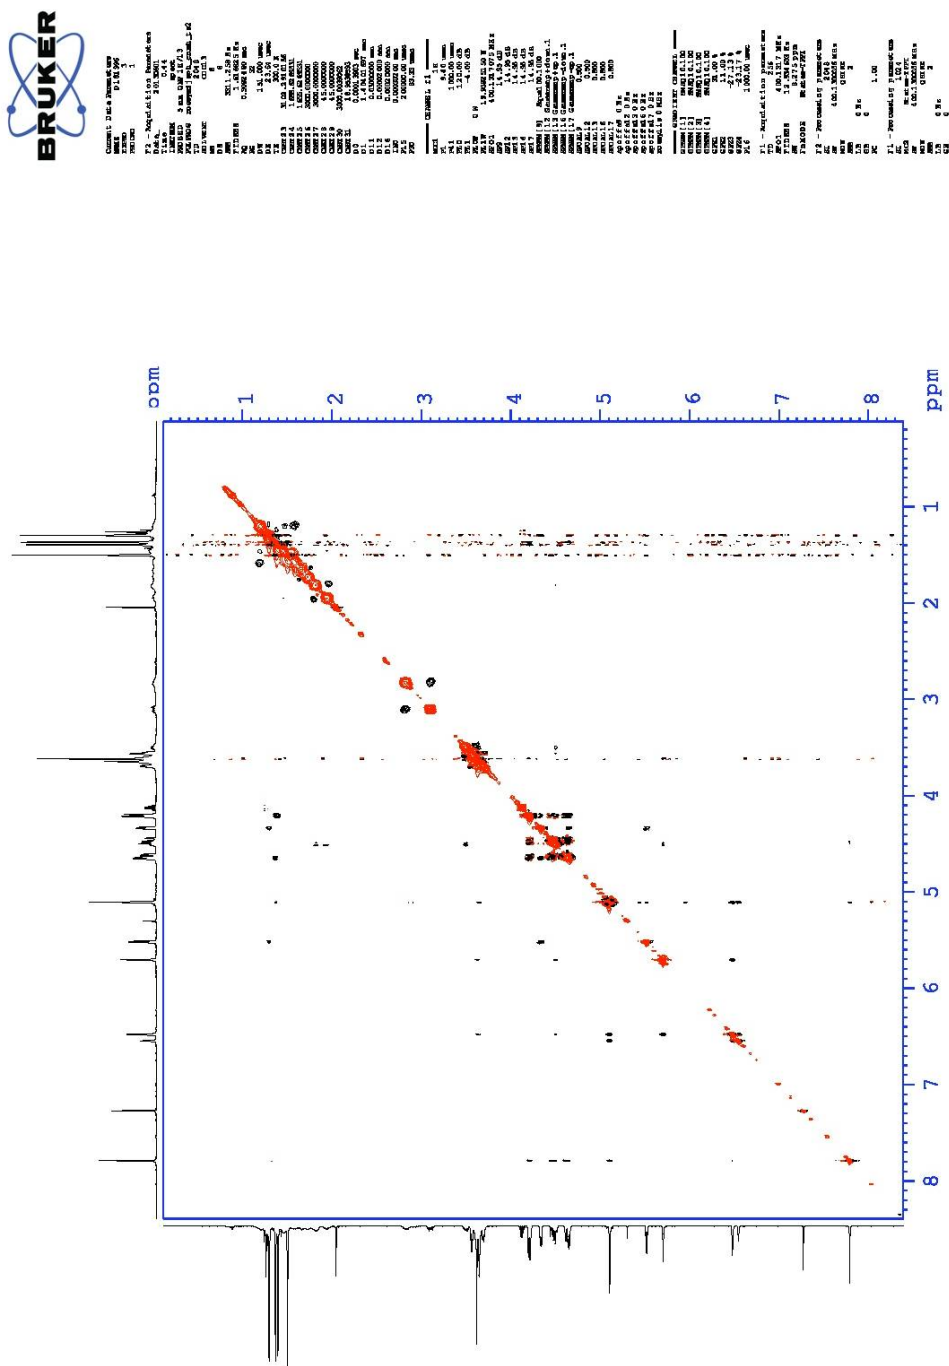

**Figure S28.** ROZY NMR spectrum of compound (**S2a**).

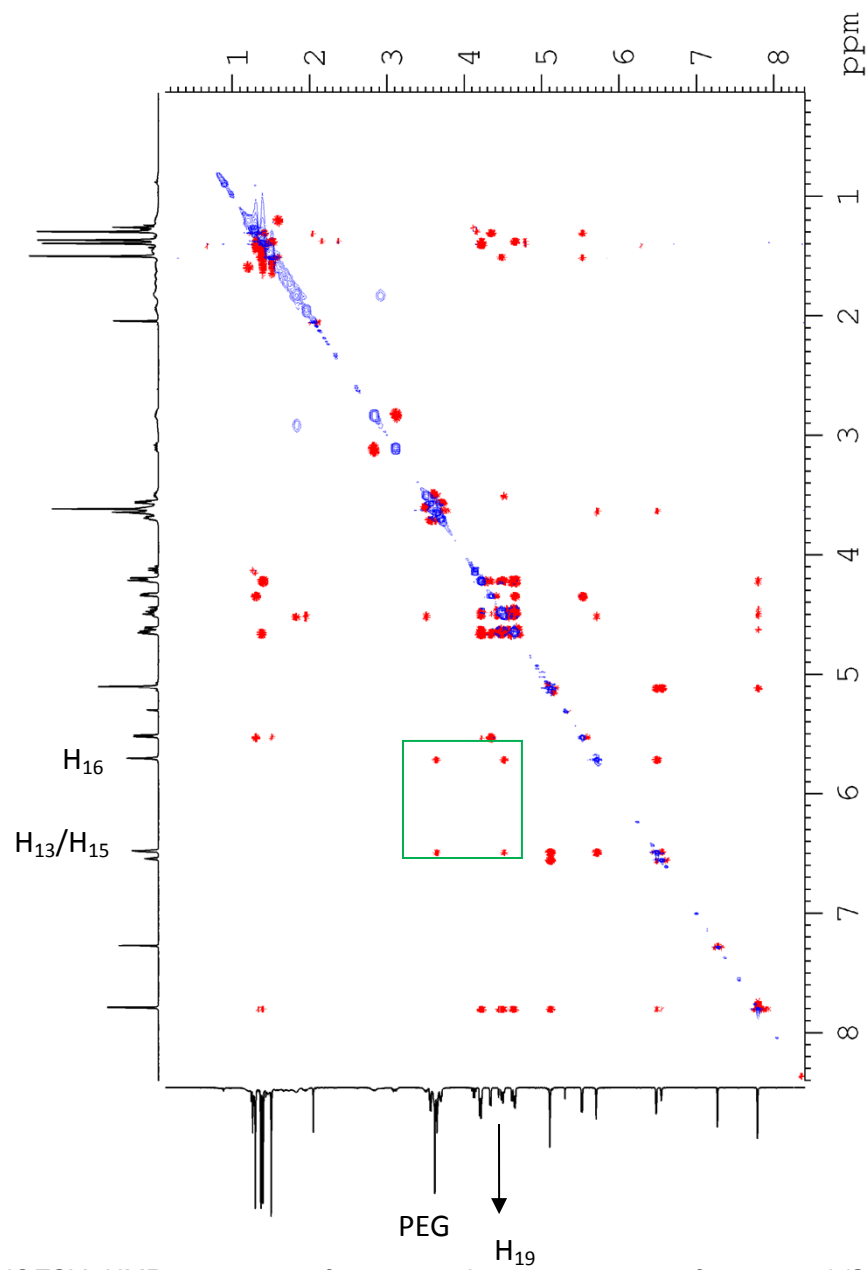

**Figure S 29.** NOESY NMR spectrum of compound *S2a* spectrum of compound (*S2a*).

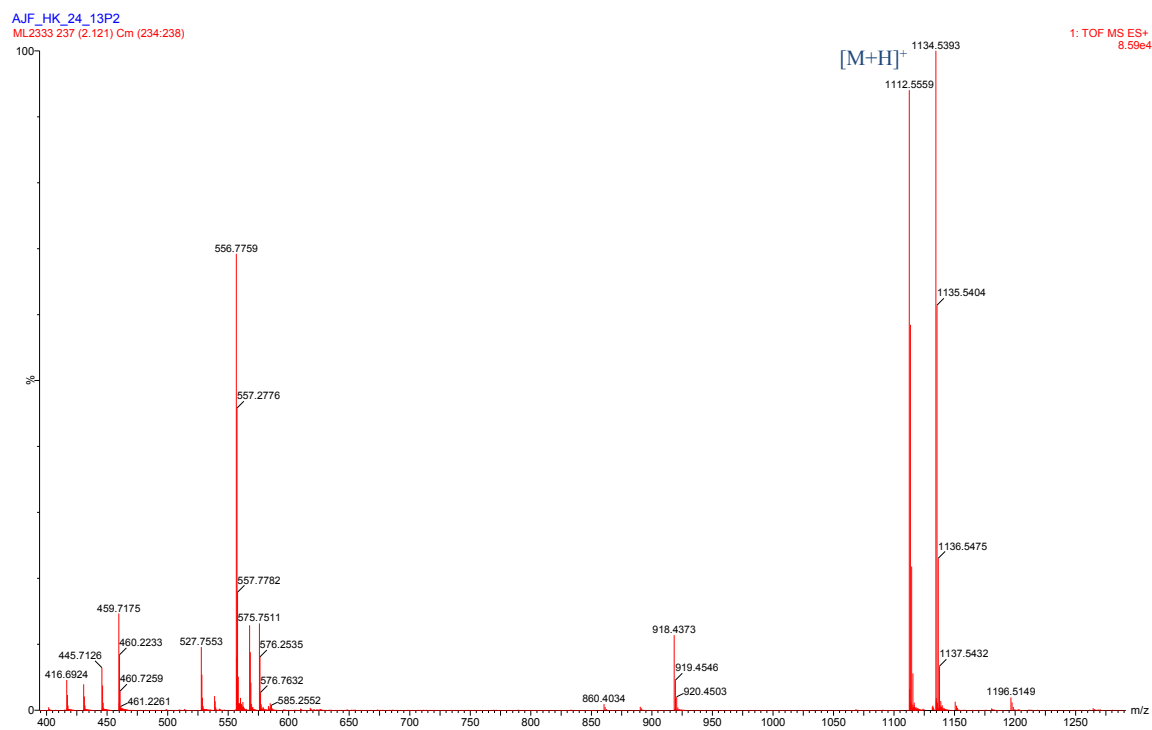

**Figure S30.** HRMS (ESI) spectra of compound (**S2b**).

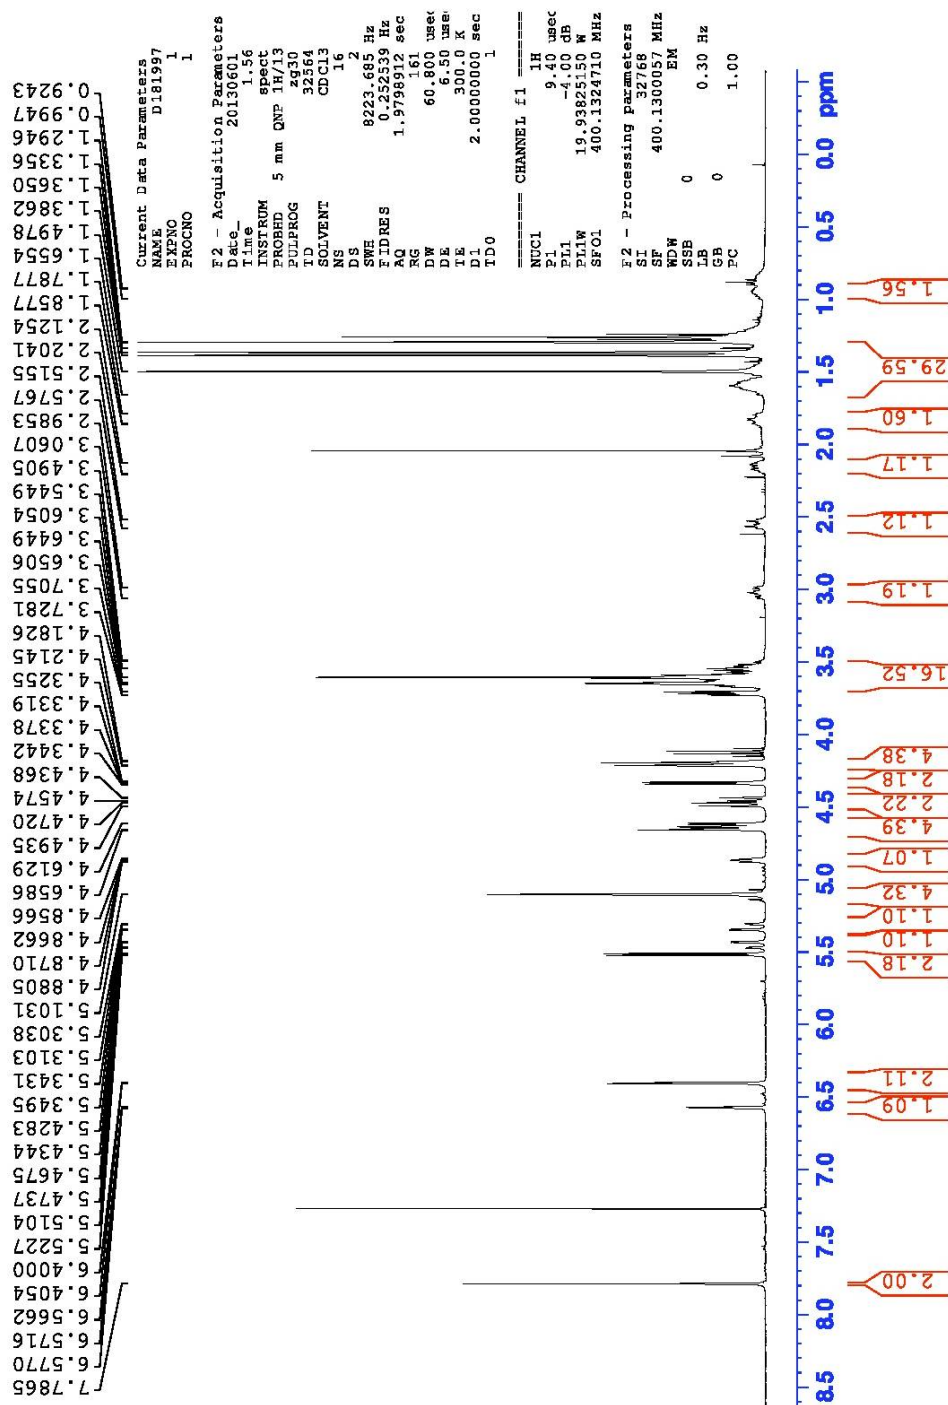Figure S31. <sup>1</sup>H NMR spectrum of compound (S2b).

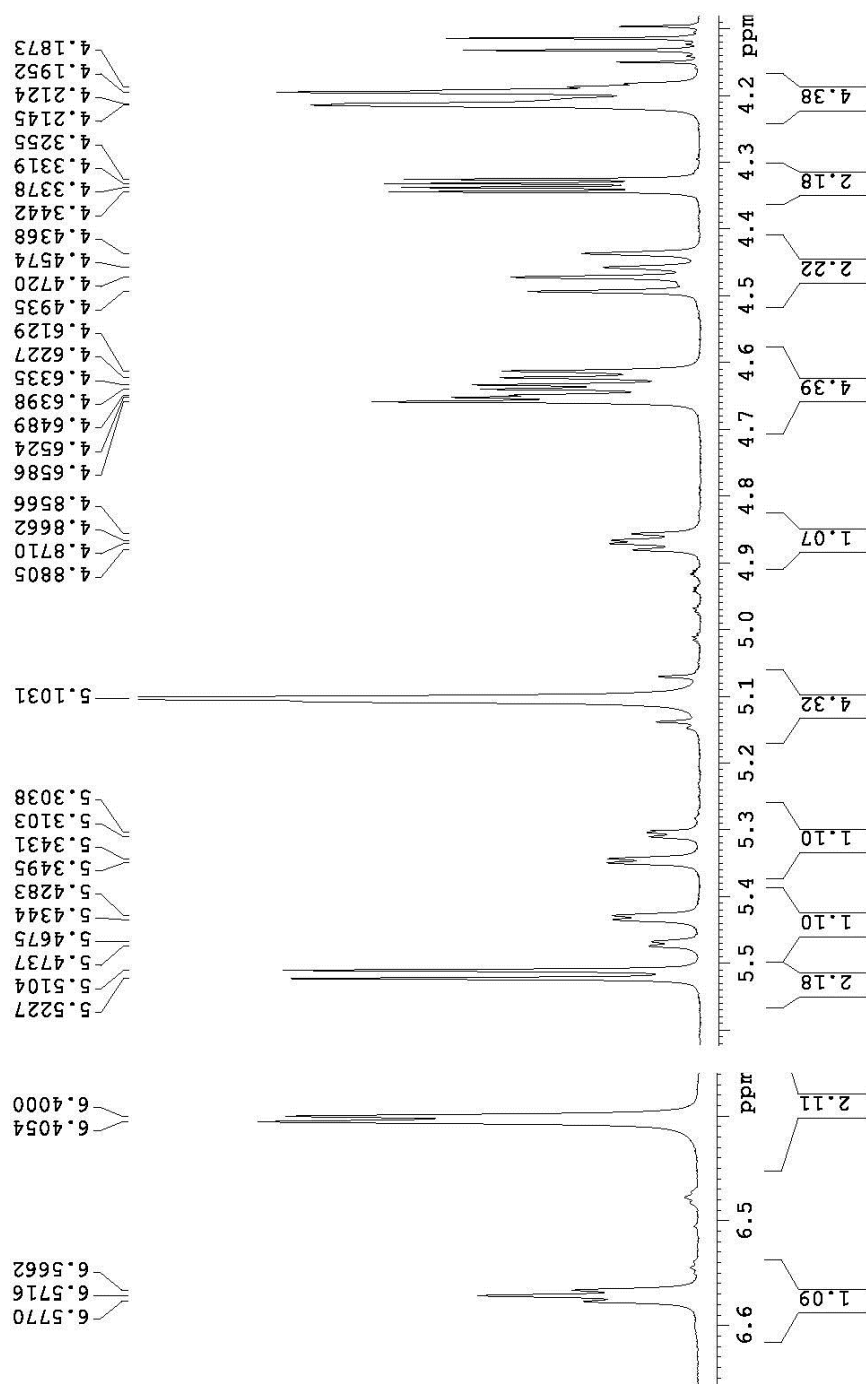

**Figure S32.** Selected areas  $^1\text{H}$  NMR of compound (S2b).

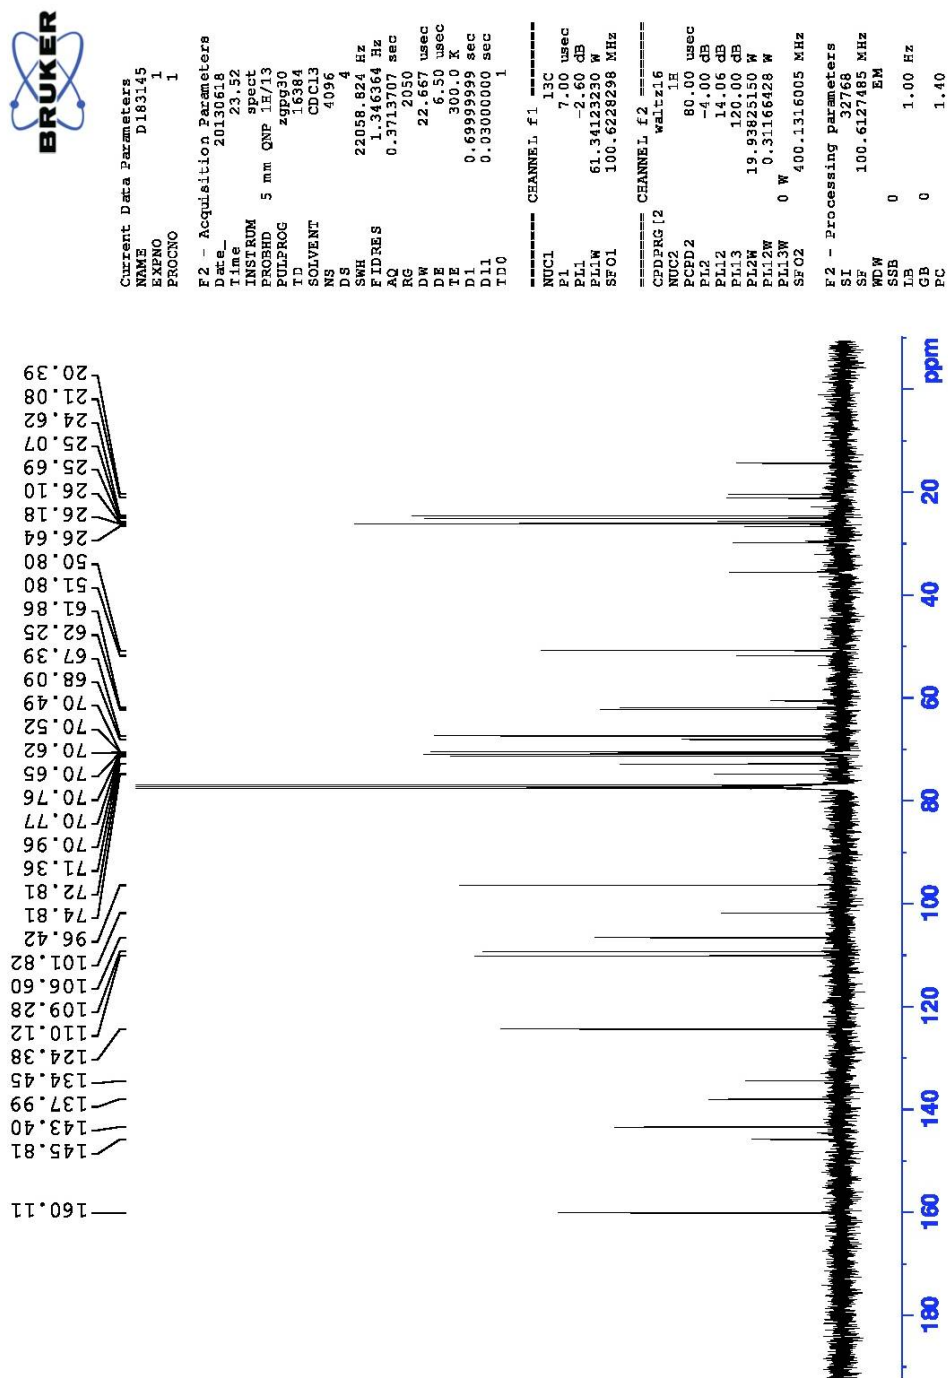Figure S33.  $^{13}\text{C}$  NMR spectrum of compound (S2b).

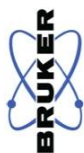

52



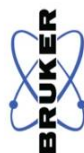

53

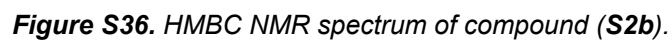

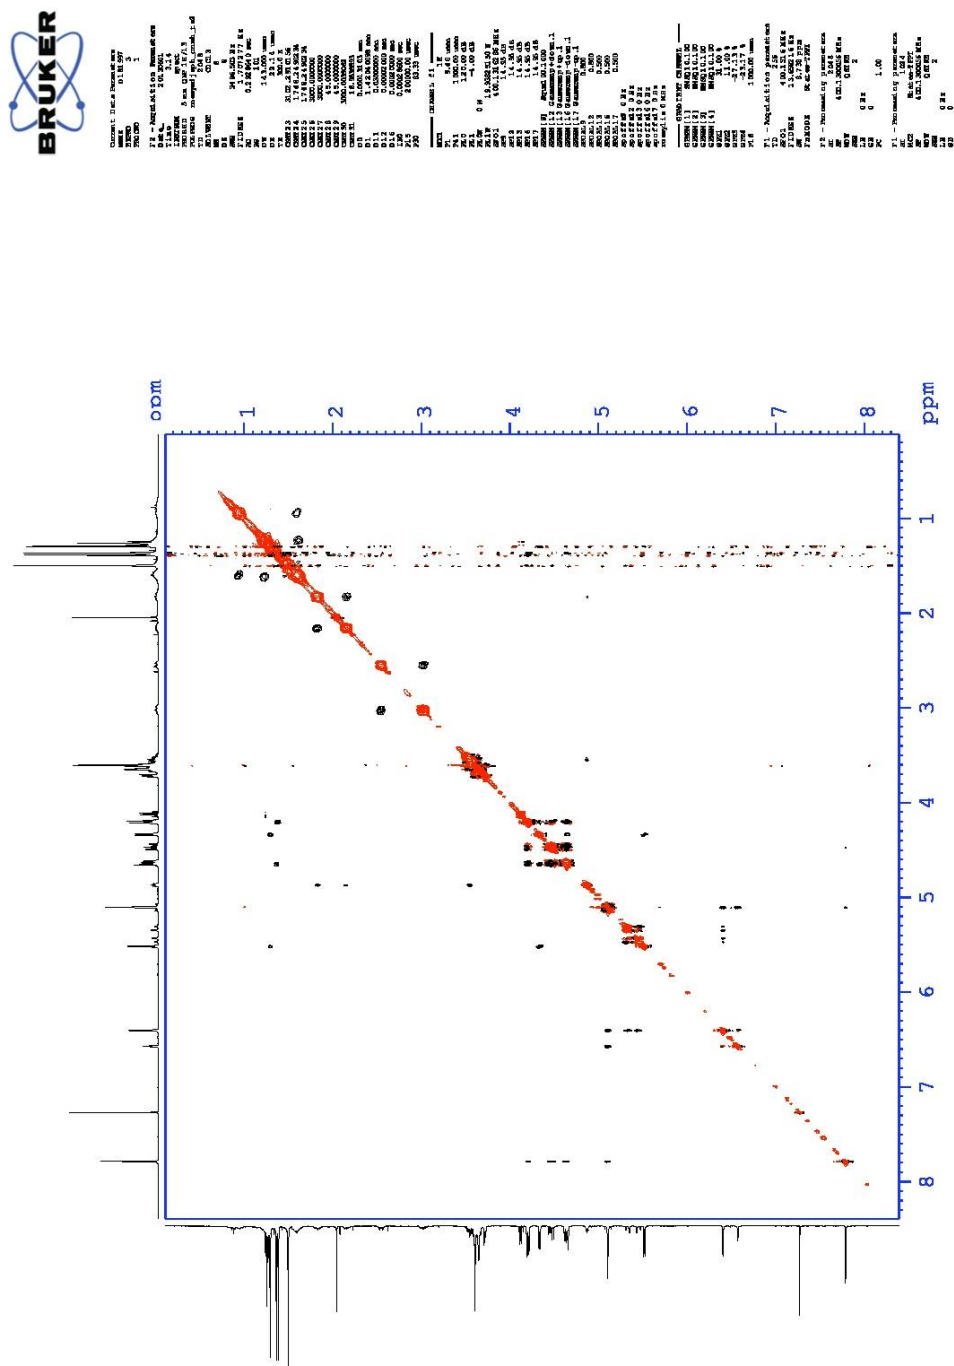

55

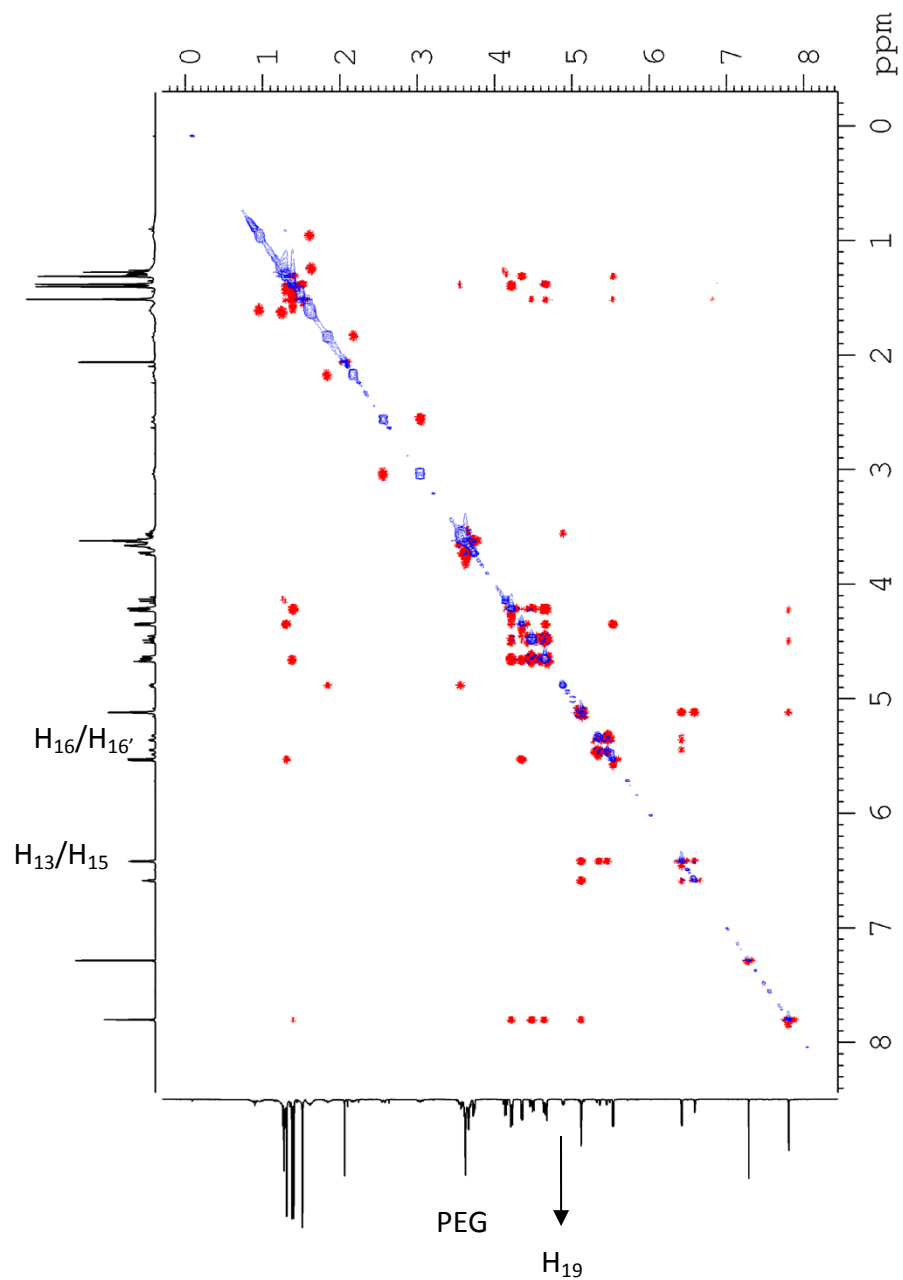

**Figure S38.** NOESY NMR spectrum of compound (S2b).

Operator:Administrator Timebase:analyticalhplc Sequence:HK-27-13

Page 1-1  
21/2/2015 5:46 PM**3 HK-28-13 p1 3rd inj**

|                  |                      |                   |          |
|------------------|----------------------|-------------------|----------|
| Sample Name:     | HK-28-13 p1 3rd inj  | Injection Volume: | 20.0     |
| Vial Number:     | RA3                  | Channel:          | UV_VIS_1 |
| Sample Type:     | unknown              | Wavelength:       | 220      |
| Control Program: | poly-p4 28min +230nm | Bandwidth:        | 10       |
| Quantif. Method: | dna method           | Dilution Factor:  | 1.0000   |
| Recording Time:  | 24/6/2013 17:49      | Sample Weight:    | 1.0000   |
| Run Time (min):  | 24.00                | Sample Amount:    | 1.0000   |

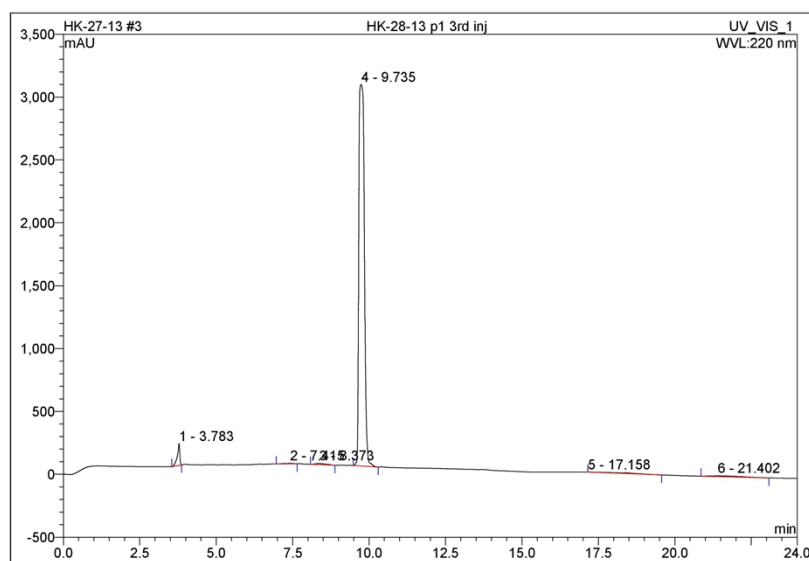

| No.           | Ret.Time<br>min | Peak Name | Height<br>mAU | Area<br>mAU*min | Rel.Area<br>% | Amount | Type |
|---------------|-----------------|-----------|---------------|-----------------|---------------|--------|------|
| 1             | 3.78            | n.a.      | 173.268       | 16.223          | 2.42          | n.a.   | BMB  |
| 2             | 7.42            | n.a.      | 3.950         | 1.622           | 0.24          | n.a.   | BMB  |
| 3             | 8.37            | n.a.      | 10.140        | 4.226           | 0.63          | n.a.   | BMB  |
| 4             | 9.74            | n.a.      | 3033.827      | 633.805         | 94.59         | n.a.   | BMB  |
| 5             | 17.16           | n.a.      | 0.000         | 5.923           | 0.88          | n.a.   | BMB  |
| 6             | 21.40           | n.a.      | 6.434         | 8.236           | 1.23          | n.a.   | BMB  |
| <b>Total:</b> |                 |           | 3227.620      | 670.035         | 100.00        | 0.000  |      |

default/integration

Chromeleon (c) Dionex 1996-2006  
Version 6.80 SP4 Build 2361 (130805)**Figure S39.** HPL chromatogram of compound (4a).

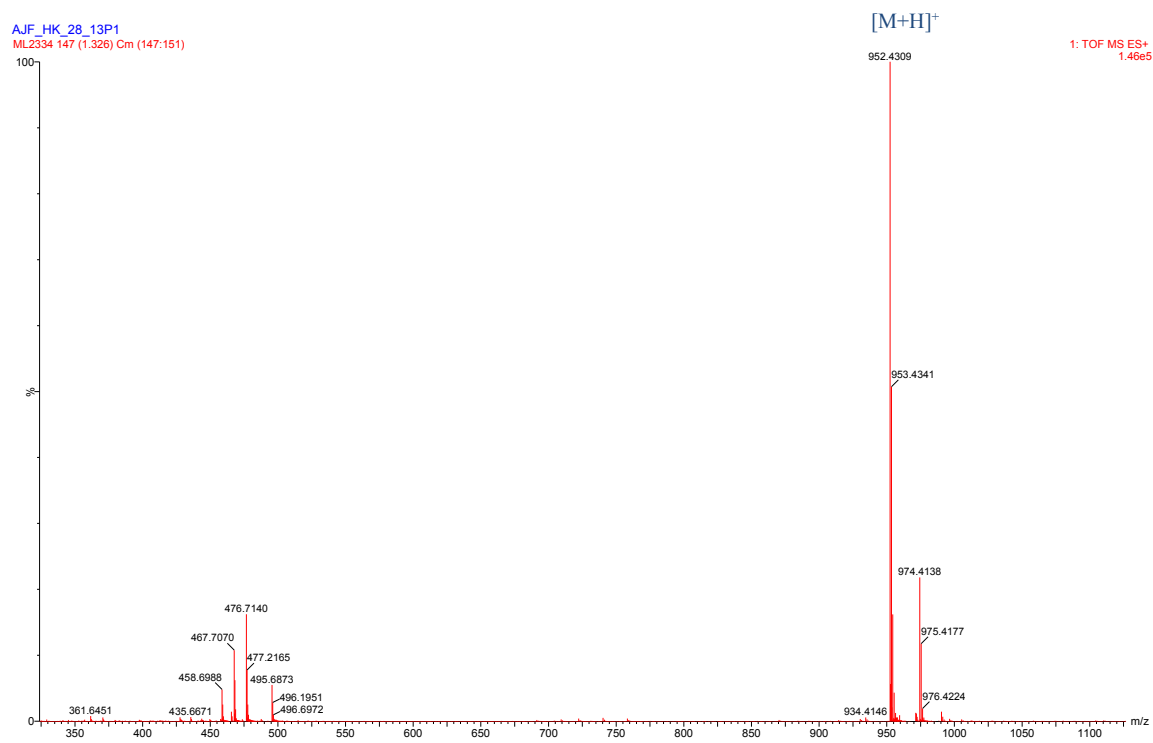

**Figure S40.** HRMS (ESI) spectra of compound (**4a**).

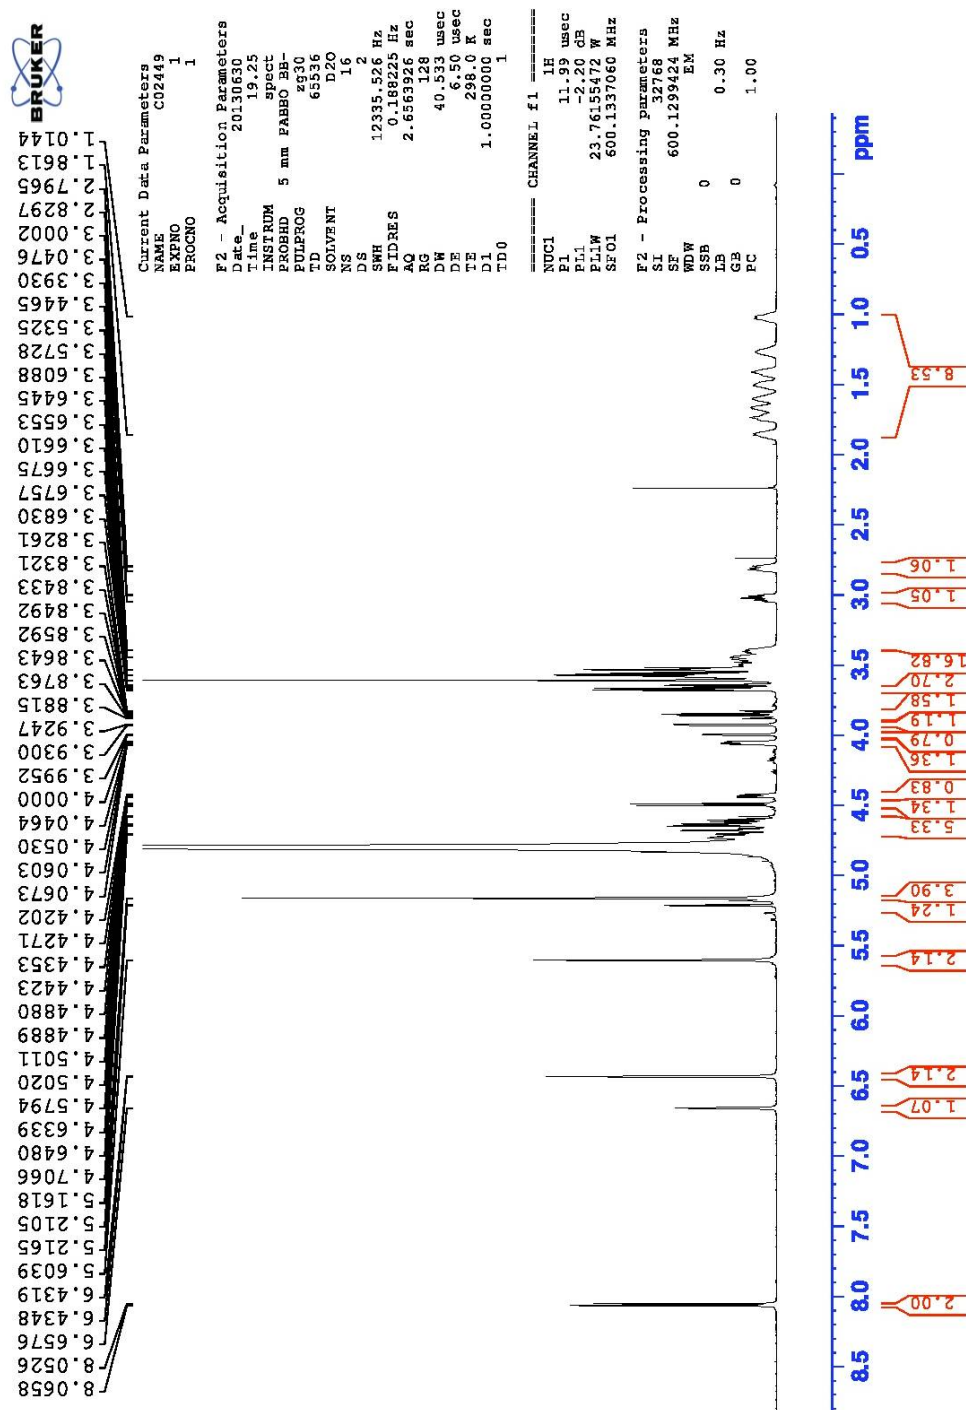Figure S41. <sup>1</sup>H NMR spectrum of compound (4a).

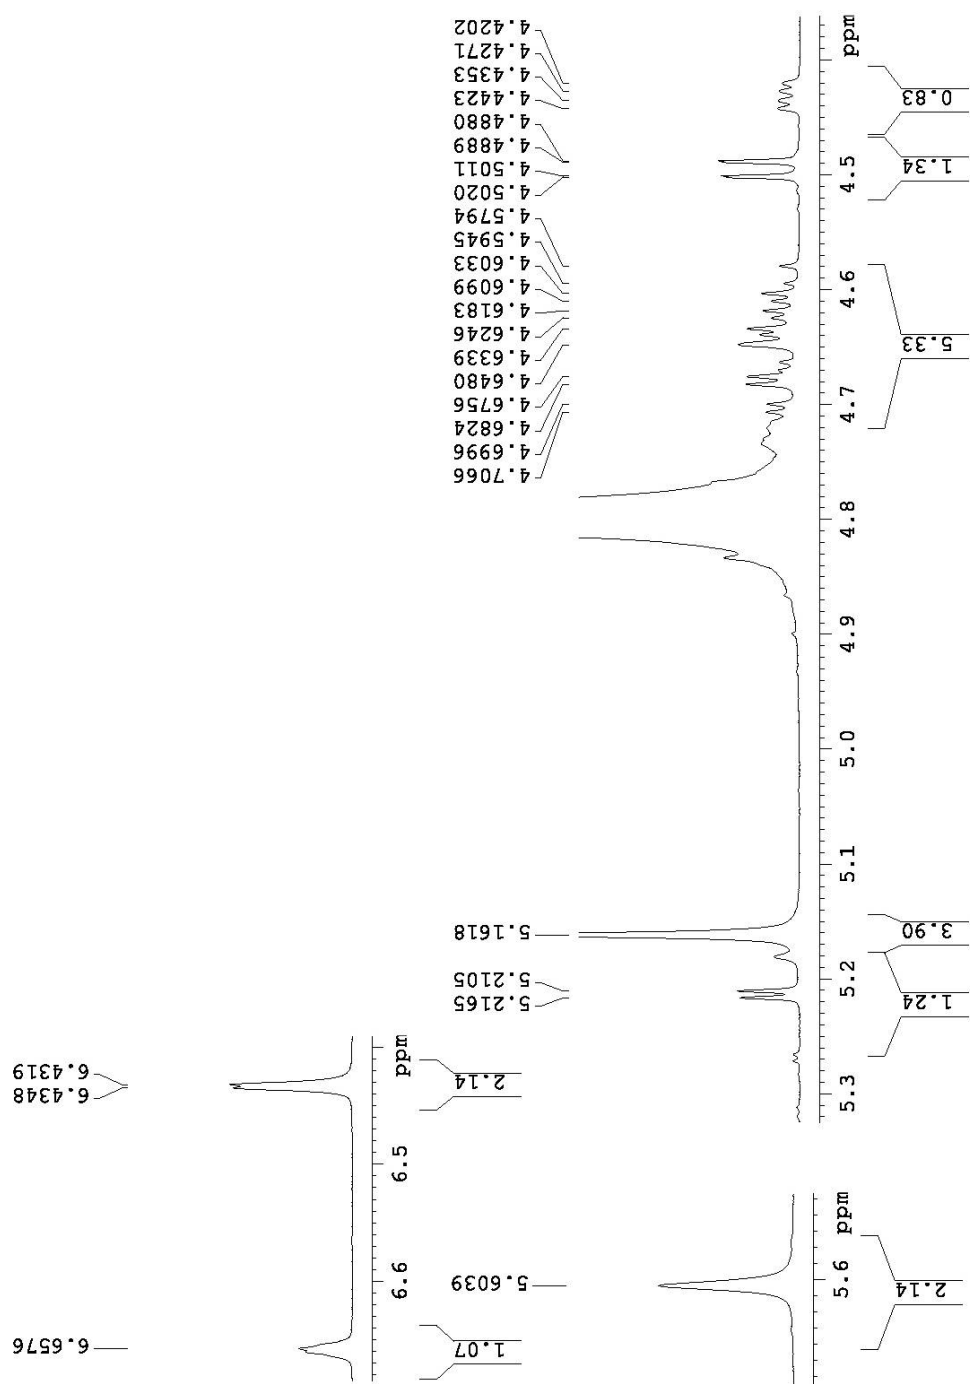

**Figure S42.** Selected areas <sup>1</sup>H NMR of compound (4a).



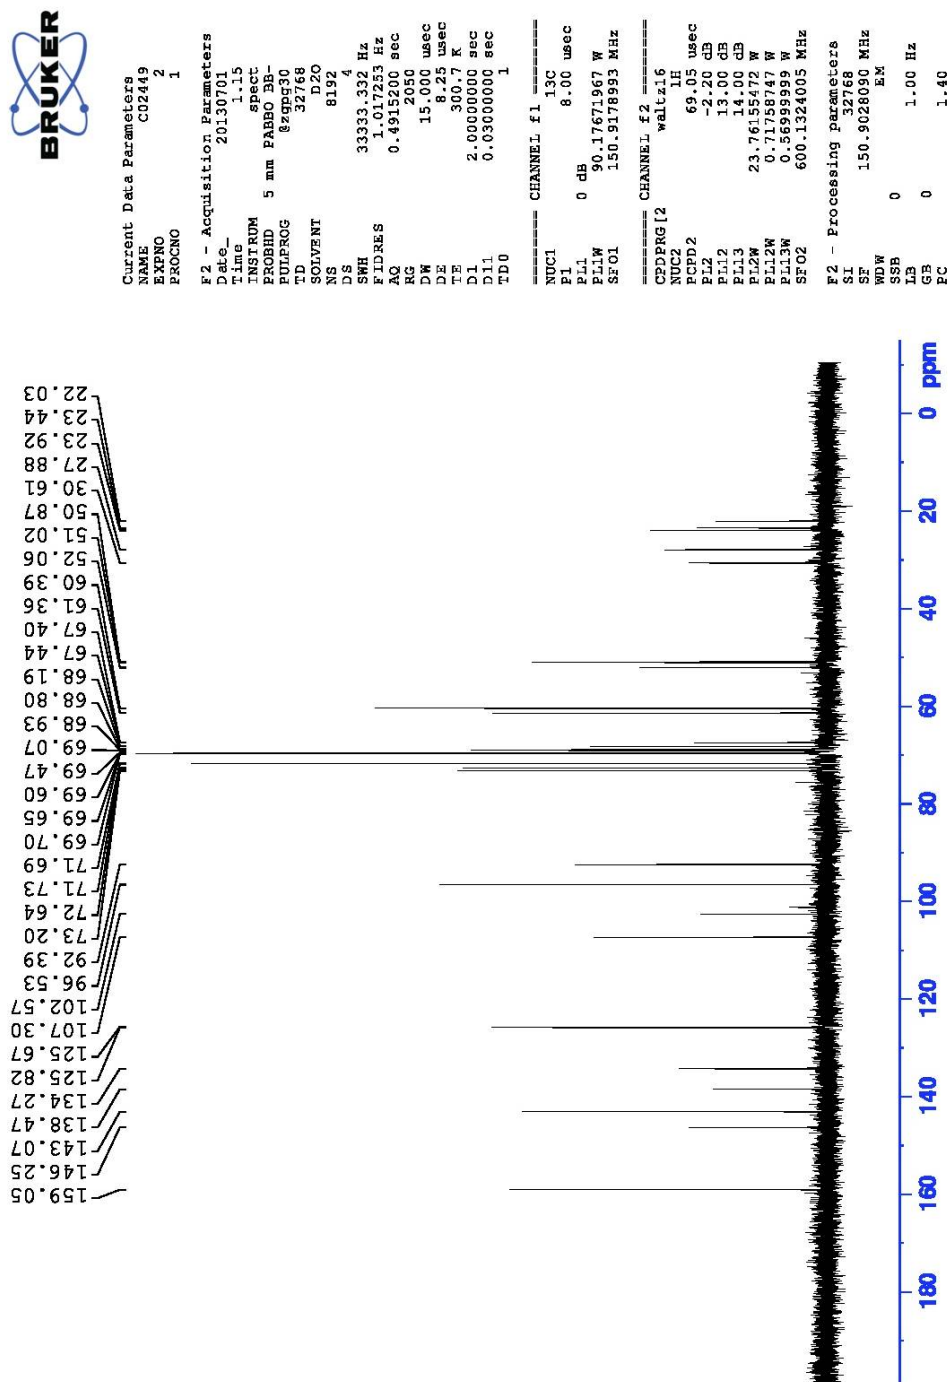

Figure S43.  $^{13}\text{C}$  NMR spectrum of compound (4a).

Operator:Administrator Timebase:analyticalhplc Sequence:HK-27-13

Page 1-1  
21/2/2015 5:47 PM**7 HK-28-13 p2 3rd inj 2nd peak**

|                  |                              |                   |          |
|------------------|------------------------------|-------------------|----------|
| Sample Name:     | HK-28-13 p2 3rd inj 2nd peak | Injection Volume: | 20.0     |
| Vial Number:     | RA7                          | Channel:          | UV_VIS_1 |
| Sample Type:     | unknown                      | Wavelength:       | 220      |
| Control Program: | poly-p4 28min +230nm         | Bandwidth:        | 10       |
| Quantif. Method: | dna method                   | Dilution Factor:  | 1.0000   |
| Recording Time:  | 24/6/2013 19:44              | Sample Weight:    | 1.0000   |
| Run Time (min):  | 24.00                        | Sample Amount:    | 1.0000   |

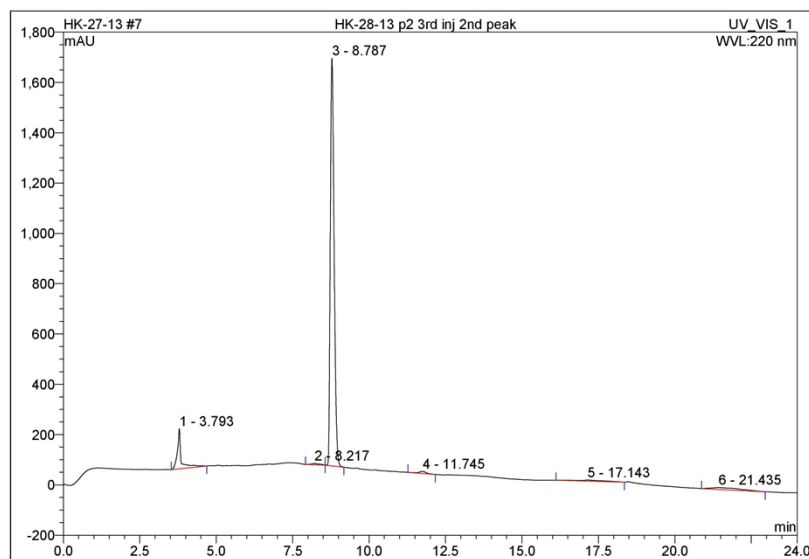

| No.           | Ret.Time<br>min | Peak Name | Height<br>mAU | Area<br>mAU*min | Rel.Area<br>% | Amount | Type |
|---------------|-----------------|-----------|---------------|-----------------|---------------|--------|------|
| 1             | 3.79            | n.a.      | 159.996       | 23.094          | 8.37          | n.a.   | BMB  |
| 2             | 8.22            | n.a.      | 5.056         | 1.612           | 0.58          | n.a.   | BMb  |
| 3             | 8.79            | n.a.      | 1620.621      | 235.657         | 85.42         | n.a.   | bMB  |
| 4             | 11.75           | n.a.      | 8.153         | 2.139           | 0.78          | n.a.   | BMB  |
| 5             | 17.14           | n.a.      | 4.423         | 4.775           | 1.73          | n.a.   | BMB  |
| 6             | 21.44           | n.a.      | 7.267         | 8.617           | 3.12          | n.a.   | BMB  |
| <b>Total:</b> |                 |           | 1805.516      | 275.894         | 100.00        | 0.000  |      |

default/integration

Chromeleon (c) Dionex 1996-2006  
Version 6.80 SP4 Build 2361 (130805)**Figure S44.** HPL chromatogram of compound (**4b**).

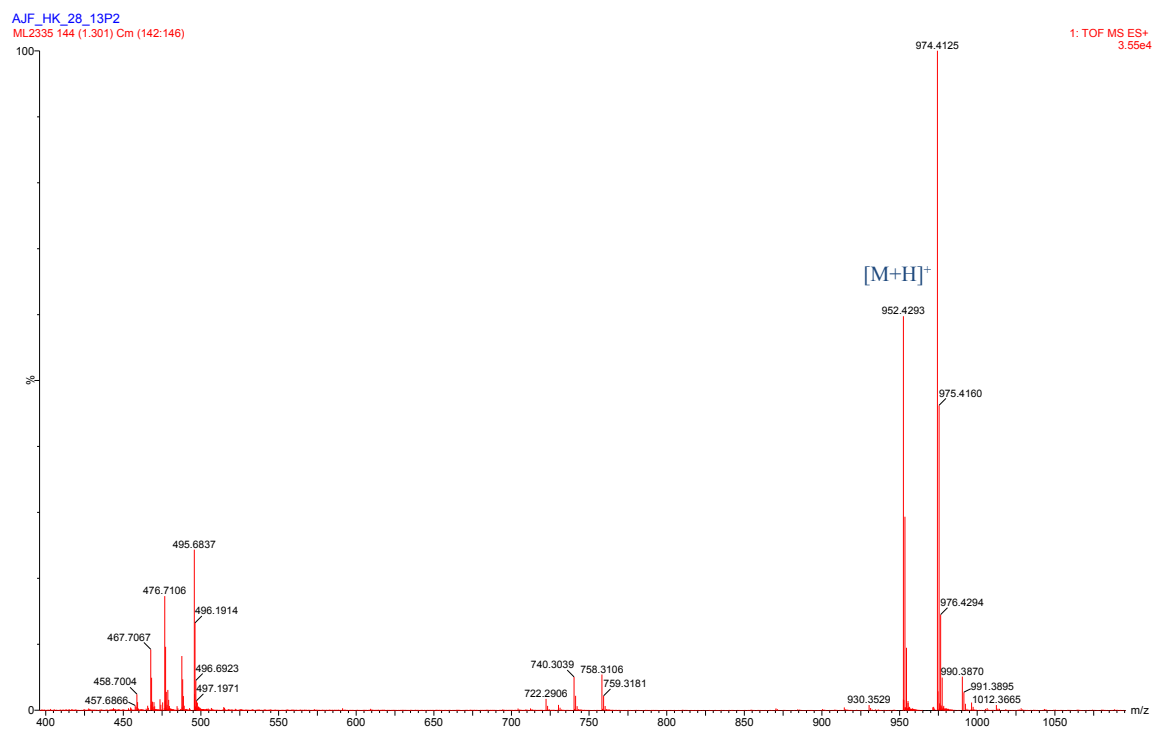

**Figure S45.** HRMS (ESI) spectra of compound (**4b**).

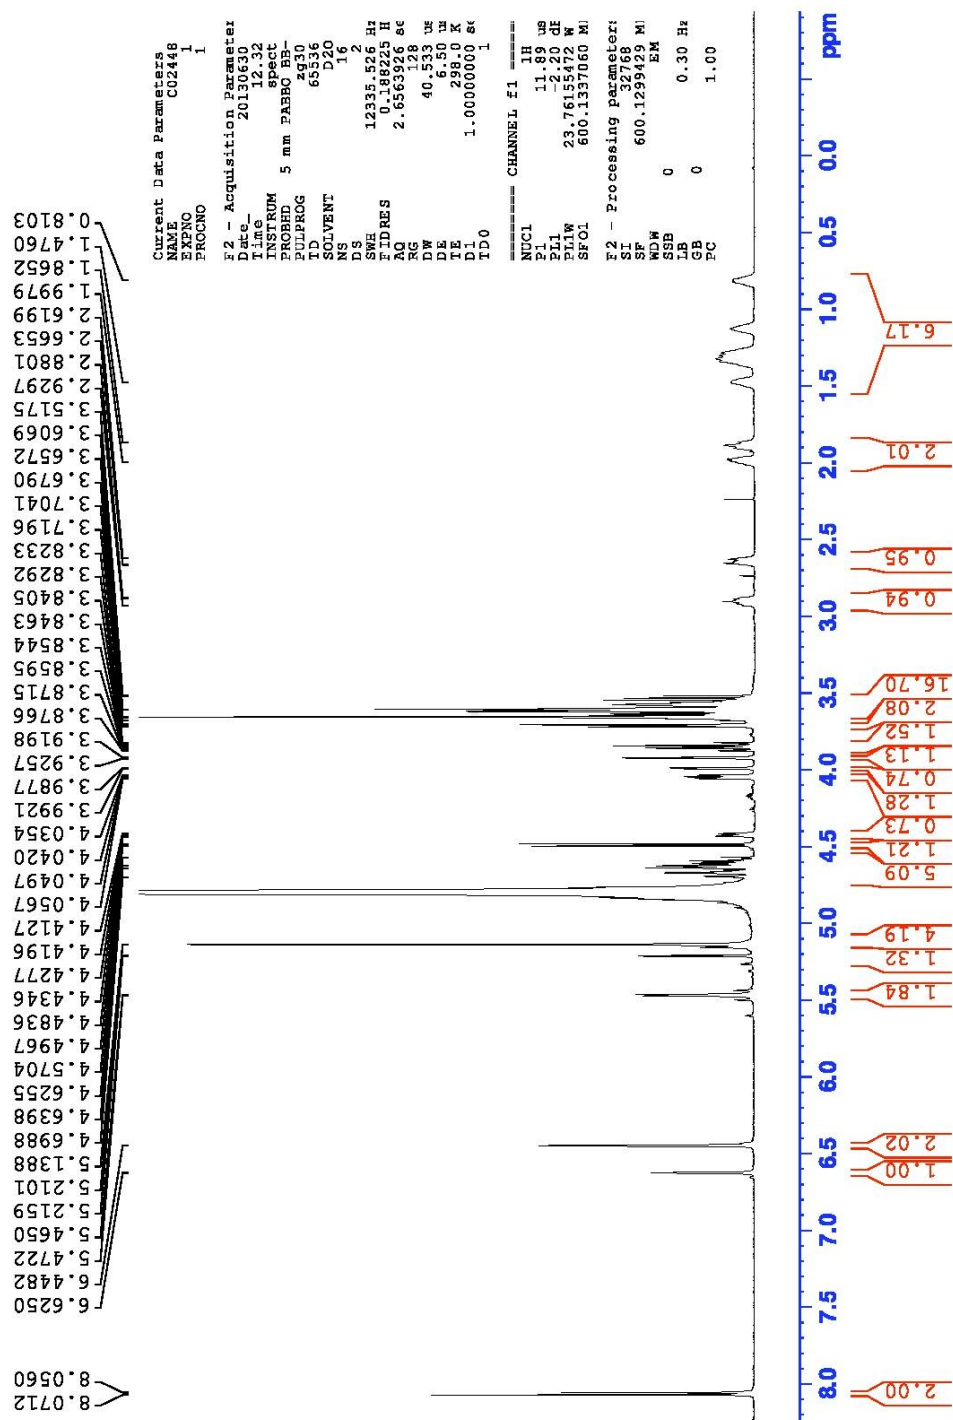Figure S46.  $^1\text{H}$  NMR spectrum of compound (**4b**).

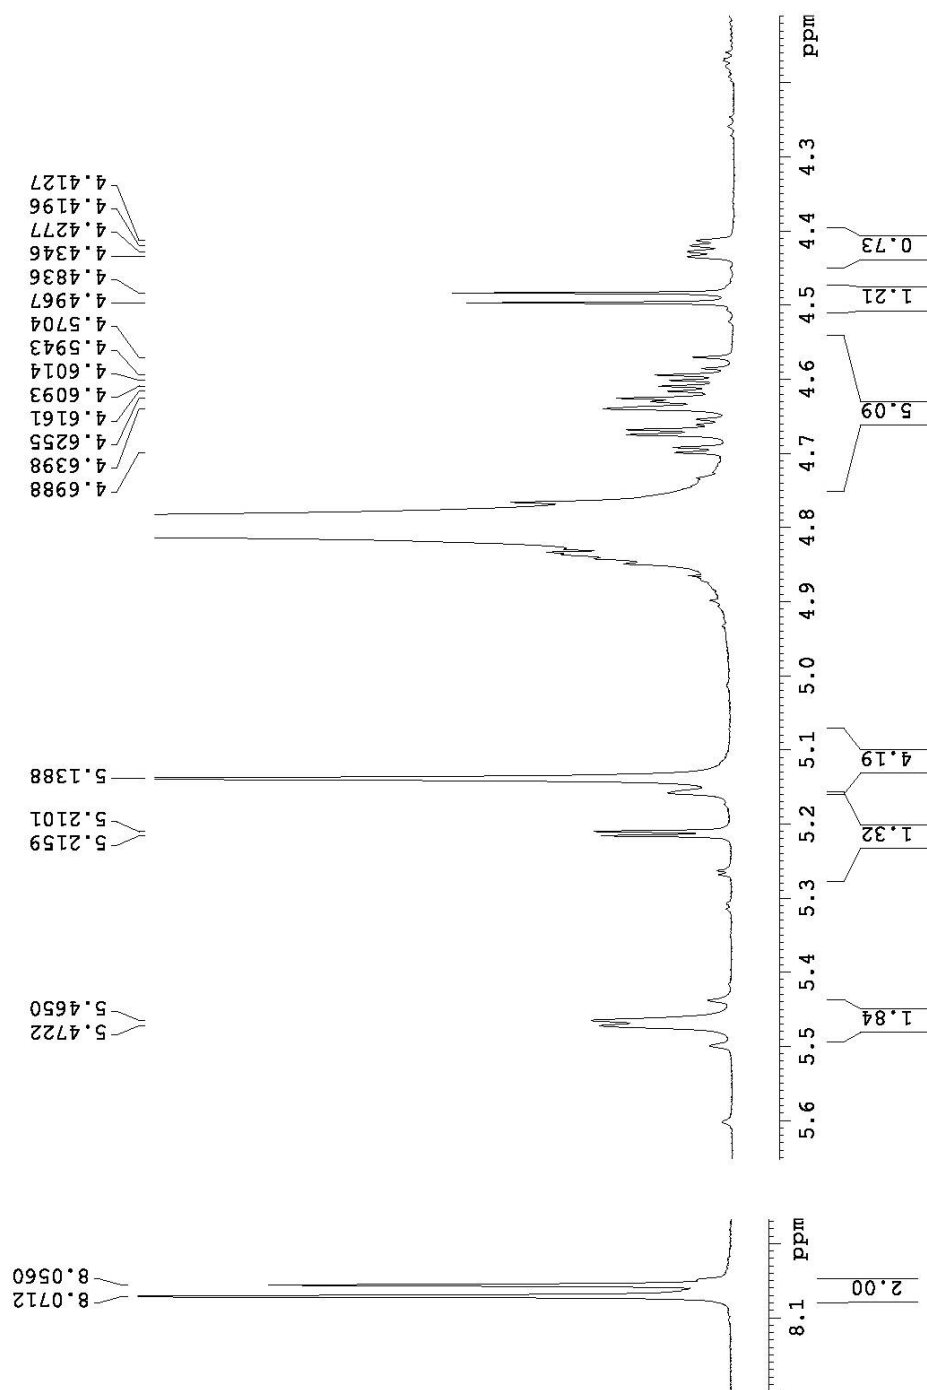

**Figure S47.** Selected areas <sup>1</sup>H NMR of compound (4b).

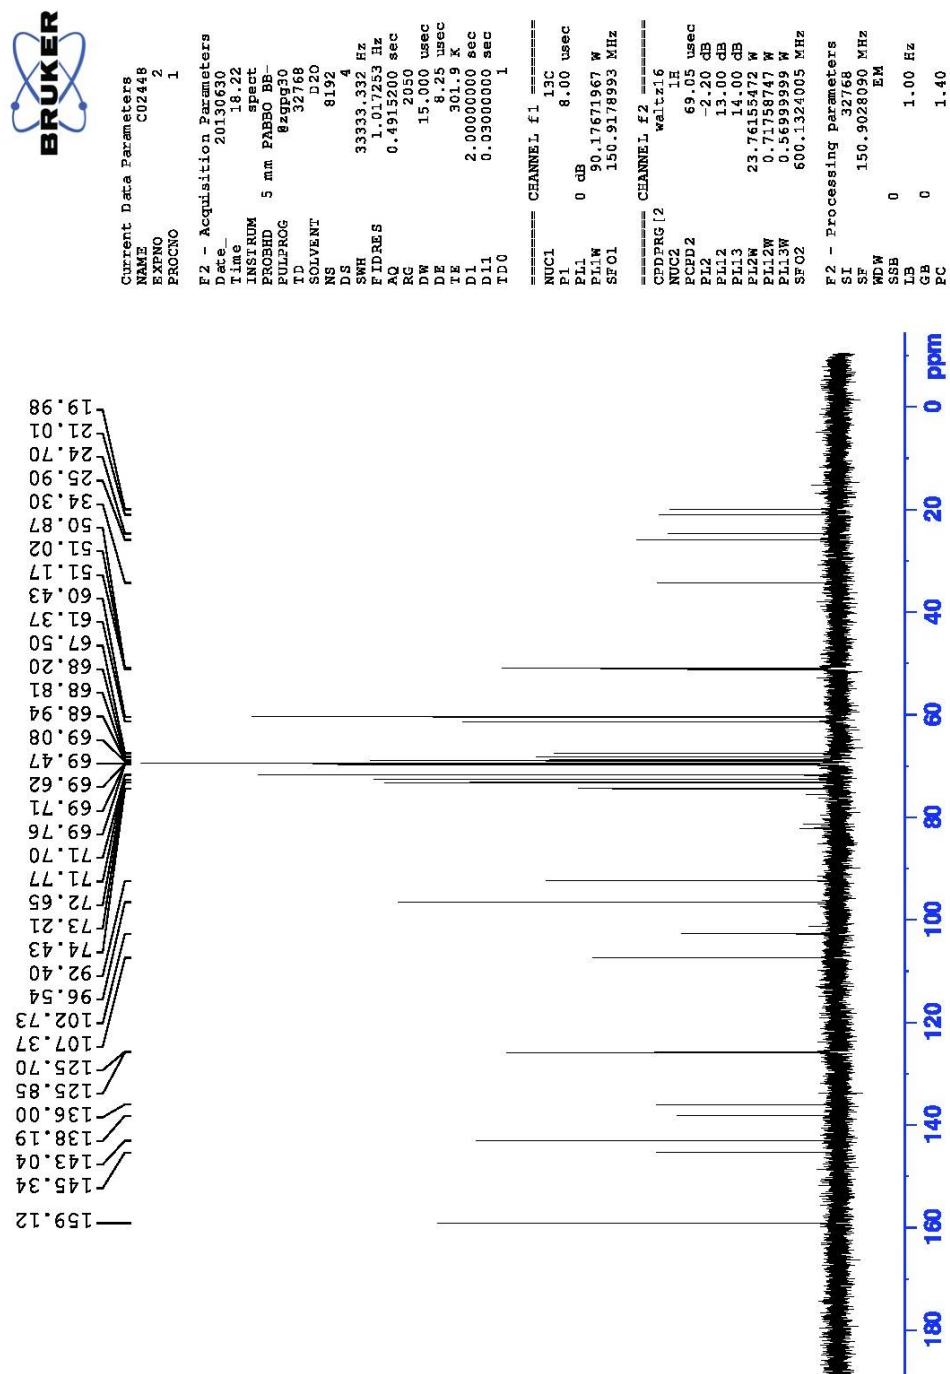

**Figure S48.**  $^{13}\text{C}$  NMR spectrum of compound (4b).

## 11.0 References

- [1] Burley, G. A.; Gierlich, J.; Mofid, M. R.; Nir, H.; Tal, S.; Eichen, Y.; Carell, T., Directed DNA Metallization. *Journal of the American Chemical Society* **2006**, *128* (5), 1398-1399.
- [2] Pinter, G.; Bereczki, I.; Roth, E.; Sipos, A.; Varghese, R.; Udo, E. E.; Ostorhazi, E.; Rozgonyi, F.; Phillips, O. A.; Herczegh, P., The Effect of Systematic Structural Modifications on the Antibacterial Activity of Novel Oxazolidinones. *Medicinal Chemistry* **2011**, *7* (1), 45-55.
- [3] Lallana, E.; Fernandez-Megia, E.; Riguera, R., Surpassing the Use of Copper in the Click Functionalization of Polymeric Nanostructures: A Strain-Promoted Approach. *Journal of the American Chemical Society* **2009**, *131* (16), 5748-5750.
- [4] Hynes, M. J., EQNMR: a computer program for the calculation of stability constants from nuclear magnetic resonance chemical shift data. *Journal of the Chemical Society, Dalton Transactions* **1993**, (2), 311-312.
